# Supplementary material for: Excited state iminium form can explain the unexpected solvatochromic behavior of symmetric 1,5- and 1,8-diaminonaphthalenes
Source: Royal Society of Chemistry journal article supplement (doi:10.1039/d3cc05643k), 2023-12-23
Supplement: d3cc05643k1.pdf [file d3cc05643k1.pdf]

# Supplementary Information

for

## Excited state iminium form can explain the unexpected solvatochromic behavior of symmetric 1,5- and 1,8-diaminonaphthalenes.

Erika Kopcsik<sup>a</sup>, Zoltán Mucsi<sup>a,c,\*</sup>, Bence Kontra<sup>c,d</sup>, László Vanyorek<sup>a</sup>, Rajmond Gál<sup>a</sup>, Béla Viskolcz<sup>a,b</sup> and Miklós Nagy<sup>a</sup> \*

<sup>a</sup> Institute of Chemistry, University of Miskolc, Miskolc-Egyetemváros, Miskolc, Hungary 3515,

<sup>b</sup> Advanced Materials and Intelligent Technologies Higher Education and Industrial Cooperation Centre, University of Miskolc, Miskolc, Hungary 3515,

<sup>c</sup> Brain Vision Center, Department of Chemistry, Vendel utca 9, H-1094 Budapest, Hungary

<sup>d</sup> Department of Organic Chemistry, Semmelweis University, Högyes Endre utca 7, H-1092, Budapest, Hungary,

\*Correspondence: nagy.miklos@uni-miskolc.hu (M.N.), [zoltanmucsi@gmail.com](mailto:zoltanmucsi@gmail.com) (Z.M.);

### Table of Contents

|                                                                                                                                                     |    |
|-----------------------------------------------------------------------------------------------------------------------------------------------------|----|
| Experimental.....                                                                                                                                   | 3  |
| Materials and Methods .....                                                                                                                         | 3  |
| Summary table of the photophysical properties of 1,5-DAN and 1,8-DAN .....                                                                          | 4  |
| Scheme S1. Chemical structures of 1,5- 1,8- and 2,3-diaminonaphthalenes (1,5-DAN, 1,8-DAN and 2,3-DAN) ..                                           | 4  |
| Fluorescence properties of 1,5-DAN.....                                                                                                             | 5  |
| Steady state emission spectra .....                                                                                                                 | 5  |
| Excitation spectra of 1,5-DAN .....                                                                                                                 | 6  |
| Emission spectra of 1,5-DAN recorded in alcohols.....                                                                                               | 7  |
| Fluorescence properties of 1,8-DAN.....                                                                                                             | 8  |
| Steady state emission spectra .....                                                                                                                 | 8  |
| Excitation spectra of 1,8-DAN .....                                                                                                                 | 9  |
| Emission spectra of 1,8-DAN recorded in alcohols.....                                                                                               | 10 |
| Investigation of the solvatochromic behavior of 1,5-DAN and 1,8-DAN .....                                                                           | 11 |
| Table S2. Solvent-independent correlation coefficients aSA, bSB, cSP and dSdP of the Catalán parameters.....                                        | 12 |
| Table S3. The SP, SdP, SA and SB solvent parameters used for constructing Figure 1g,h (Figure S7) using the Catalán equation.....                   | 13 |
| Table S4. The ground (S0) and excited state (S1) geometrical and optical properties of DANS calculated on B3LYP/6-311++G(2d,2p) level in DMSO. .... | 14 |
| Theoretical results .....                                                                                                                           | 15 |

|                                                                                                                                                                                                                                                                                                                                                                         |    |
|-------------------------------------------------------------------------------------------------------------------------------------------------------------------------------------------------------------------------------------------------------------------------------------------------------------------------------------------------------------------------|----|
| Figure S8. A) The calculated photochemical mechanisms and the corresponding potential energy surfaces (PES) of the ground (blue line, $S_0$ ), excited (red line, $S_1$ ) and triplet states (green line, $T_1$ ) of 2,3-DAN, 1,8-DAN and 1,5-DAN computed at B3LYP/6-311++G(2d,2p)/PCM(DMSO) at $S_0$ state and TD-B3LYP/6-311++G(2d,2p)/PCM(DMSO) at $S_1$ state..... | 16 |
| B) Definition of Pyramidity explained by various amine derivatives as examples.....                                                                                                                                                                                                                                                                                     | 16 |
| Fig. S9. 3D geometries and 2D representations of 2,3-DAN at $S_0$ and $S_1$ states. ....                                                                                                                                                                                                                                                                                | 17 |
| Fig. S10. Various 3D geometries and 2D representations of 1,8-DAN at $S_0$ and $S_1$ states. ....                                                                                                                                                                                                                                                                       | 18 |
| Fig. S11. Various 3D geometries and 2D representations of 1,5-DAN at $S_0$ and $S_1$ states. ....                                                                                                                                                                                                                                                                       | 19 |
| Figure S12. The suggested resonance structures of 1,5-DAN, 1,8-DAN and 2,3-DAN respectively calculated by MarvinSketch software.....                                                                                                                                                                                                                                    | 19 |
| Fig. S13. The optimized structure and emission spectrum of 1,5-diaminoanthracene in $S_1$ state, calculated using the implicit-explicit solvent model. ....                                                                                                                                                                                                             | 20 |
| Raw computational data.....                                                                                                                                                                                                                                                                                                                                             | 21 |

## Experimental

### Materials and Methods

#### **1,5-DAN: 1,5-diamino naphthalene:**

CAS: 2243-62-1

MW: 158.2 g/mol

From: Acros organics, Cat: 112290250

#### **1,8-DAN: 1,8-diamino naphthalene:**

CAS: 479-27-6

MW: 158.2 g/mol

From: Sigma-aldrich, Cat: D21405-5G

Acetone, dichloromethane (DCM), hexane, 2-propanol (iPrOH), toluene, ethyl-acetate (EtOAc) (reagent grade, Molar Chemicals, Hungary) were purified by distillation. Acetonitrile (MeCN), tetrahydrofuran (THF), methanol (MeOH), dimethyl formamide (DMF), dimethyl sulfoxide (DMSO), pyridine (HPLC grade, VWR, Germany), cyclohexane, 1,4-dioxane (reagent grade, Reanal, Hungary), were used without further purification. Other solvents and reagents were purchased from Sigma Aldrich in reagent grade and used as received.

*UV-vis*: The UV-vis spectra were recorded on a UV-6300PC double beam spectrophotometer (VWR International) in a quartz cuvette of 1.00 cm optical length. A 3.00 cm<sup>3</sup> solution was prepared from the sample. Background was recorded for the pure solvent in the reference cuvette.

Steady-state fluorescence measurements were carried out using a Jasco FP-8550 fluorescence spectrophotometer equipped with a Xe lamp light source. The excitation and emission spectra were recorded at 20 °C, using 2.5 nm excitation, 2.5 nm emission bandwidth and 200 nm/min scanning speed. Fluorescence quantum yields ( $\Phi_F$ ) were calculated by using quinine-sulfate as the reference, using the following equation:

$$\Phi_F = \Phi_r * \frac{I}{I_{ref}} * \frac{A_{ref}}{A} * \frac{n^2}{n_{ref}^2}$$

where  $\Phi_r$  is the quantum yield of the reference compound (quinine-sulfate in 0.1 mol/L perchloric acid, absolute quantum efficiency ( $\Phi_r = 55\%$ )),  $n$  is the refractive index of the solvent,  $I$  is the integrated fluorescence intensity and  $A$  is the absorbance at the excitation wavelength. The absorbances at the wavelength of excitation were kept below  $A = 0.1$  in order to avoid inner filter effects.

For UV-vis and fluorescence measurements, the investigated compounds were dissolved in acetonitrile at a concentration of 3.11 mM and were diluted to  $1.05 \times 10^{-5}$  M (1,5-DAN) and  $1.38 \times 10^{-5}$  M (1,8-DAN) in the solvents in interest. The spectra were processed using Spectragryph software.

## Summary table of the photophysical properties of 1,5-DAN and 1,8-DAN

**Table S1.** The absorption maximum wavelengths ( $\lambda_{\text{Abs}}$ ), the molar extinction coefficients at  $\lambda_{\text{Abs}}$  ( $\epsilon$ ) the fluorescence emission maxima ( $\lambda_{\text{Em}}$ ) the quantum yields ( $\Phi_f$ ) determined in various solvents for 1,5-diaminonaphthalene (1,5-DAN) and 1,8-diaminonaphthalene (1,8-DAN). The dielectric constants of the solvents ( $\epsilon_r$ )\* are listed next to the solvent names.

| Solvent ( $\epsilon_r$ ) | 1,5-DAN                     |                                               |                            |                            |              |                                       | 1,8-DAN                     |                                               |                            |                            |              |                                       |
|--------------------------|-----------------------------|-----------------------------------------------|----------------------------|----------------------------|--------------|---------------------------------------|-----------------------------|-----------------------------------------------|----------------------------|----------------------------|--------------|---------------------------------------|
|                          | $\lambda_{\text{Abs}}$ (nm) | $\epsilon \times 10^{-3}$ ( $M^{-1}cm^{-1}$ ) | $\lambda_{\text{Ex}}$ (nm) | $\lambda_{\text{Em}}$ (nm) | $\Phi_f$ (%) | $\Delta\nu_{\text{SS}}$ ( $cm^{-1}$ ) | $\lambda_{\text{Abs}}$ (nm) | $\epsilon \times 10^{-3}$ ( $M^{-1}cm^{-1}$ ) | $\lambda_{\text{Ex}}$ (nm) | $\lambda_{\text{Em}}$ (nm) | $\Phi_f$ (%) | $\Delta\nu_{\text{SS}}$ ( $cm^{-1}$ ) |
| n-Hexane (1.88)          | 321                         | 9.97                                          | 329                        | 367                        | 50.0         | 3904                                  | 347                         | 8.29                                          | 347                        | 398                        | 16.5         | 3693                                  |
| Dioxane (2.21)           | 334                         | 13.6                                          | 344                        | 377                        | 49.4         | 3414                                  | 351                         | 10.5                                          | 351                        | 407                        | 15.2         | 3920                                  |
| Toluene (2.37)           | 331                         | 12.7                                          | 342                        | 374                        | 40.8         | 3474                                  | 350                         | 8.98                                          | 350                        | 406                        | 21.2         | 3941                                  |
| EtOAc (5.99)             | 332                         | 12.1                                          | 333                        | 376                        | 34.0         | 3525                                  | 350                         | 8.93                                          | 350                        | 410                        | 16.4         | 4181                                  |
| THF (7.58)               | 336                         | 12.3                                          | 344                        | 378                        | 39.8         | 3307                                  | 351                         | 9.55                                          | 351                        | 411                        | 15.0         | 4159                                  |
| DCM (8.93)               | 332                         | 11.7                                          | 319                        | 374                        | 7.6          | 3383                                  | 349                         | 8.79                                          | 335                        | 414                        | 17.5         | 4499                                  |
| Pyridine (12.4)          | 349                         | 13.0                                          | -                          | -                          | -            | -                                     | 354                         | 10.2                                          | -                          | -                          | -            | -                                     |
| 2-propanol (19.3)        | 330                         | 11.7                                          | 329                        | 392                        | 43.1         | 4793                                  | 334                         | 8.78                                          | 336                        | 425                        | 27.5         | 6411                                  |
| Acetone (20.5)           | 344                         | 12.5                                          | 343                        | 383                        | 1.6          | 2960                                  | 350                         | 9.19                                          | 350                        | 411                        | 2.3          | 4241                                  |
| Methanol (32.6)          | 328                         | 12.1                                          | 329                        | 391                        | 39.9         | 4912                                  | 335                         | 8.76                                          | 346                        | 426                        | 15.8         | 6377                                  |
| DMF (37.2)               | 348                         | 14.1                                          | 349                        | 383                        | 51.5         | 2626                                  | 353                         | 9.91                                          | 353                        | 415                        | 23.2         | 4232                                  |
| Acetonitrile (35.7)      | 333                         | 12.4                                          | 333                        | 377                        | 37.4         | 3505                                  | 350                         | 8.93                                          | 350                        | 416                        | 21.9         | 4533                                  |
| DMSO (46.8)              | 351                         | 15.9                                          | 351                        | 387                        | 63.1         | 2650                                  | 354                         | 10.8                                          | 355                        | 416                        | 27.3         | 4210                                  |
| Water (78.4)             | 324                         | 10.8                                          | 314                        | 406                        | 36.2         | 6234                                  | 329                         | 8.10                                          | 329                        | 439                        | 7.5          | 7616                                  |

\*The dielectric constants were collected from the Gaussian website and are the same as used by Gaussian 16 software when CPCM solvent model is set during calculations. ([https://gaussian.com/scrf/?fbclid=IwAR3IfO9eGH\\_hadhxrPZbiFQoaGsYrmTd\\_foD8wqP6Ny3vGxZDX3VAa94](https://gaussian.com/scrf/?fbclid=IwAR3IfO9eGH_hadhxrPZbiFQoaGsYrmTd_foD8wqP6Ny3vGxZDX3VAa94)). They are rounded to three significant digits and only serve as a measure to order the solvents according to increasing solvent polarity.

**1,5-diaminonaphthalene**    **1,8-diaminonaphthalene**    **2,3-diaminonaphthalene**  
**1,5-DAN**                      **1,8-DAN**                      **2,3-DAN**

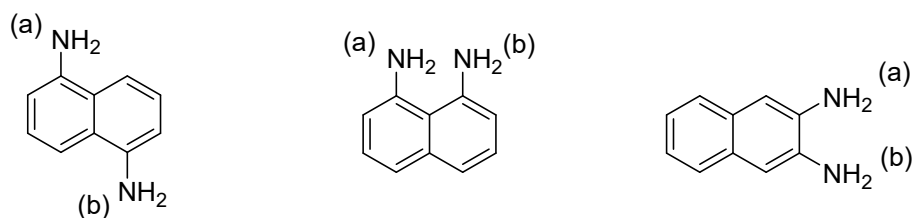

**Scheme S1.** Chemical structures of 1,5- 1,8- and 2,3-diaminonaphthalenes (1,5-DAN, 1,8-DAN and 2,3-DAN)

## Fluorescence properties of 1,5-DAN

### Steady state emission spectra

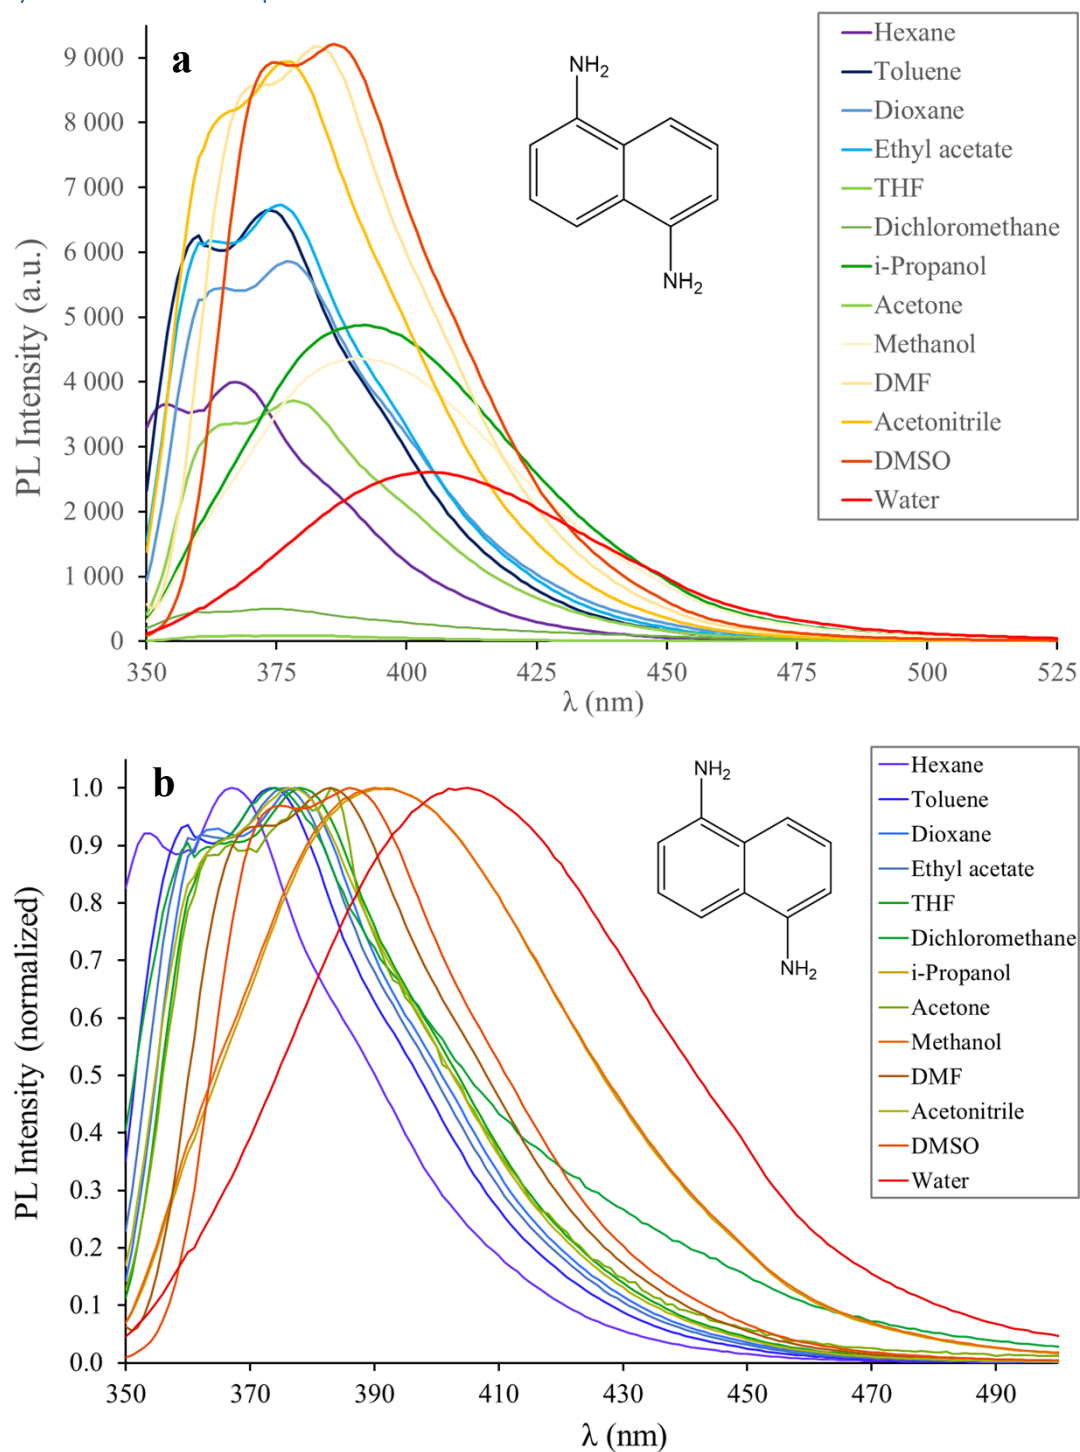

**Figure S1.** (a) Steady-state fluorescence spectra of 1,5-DAN recorded in various solvents of different polarity. (b) The normalized emission spectra. ([dye] =  $1.05 \times 10^{-5}$  M, T = 20 °C).

## Excitation spectra of 1,5-DAN

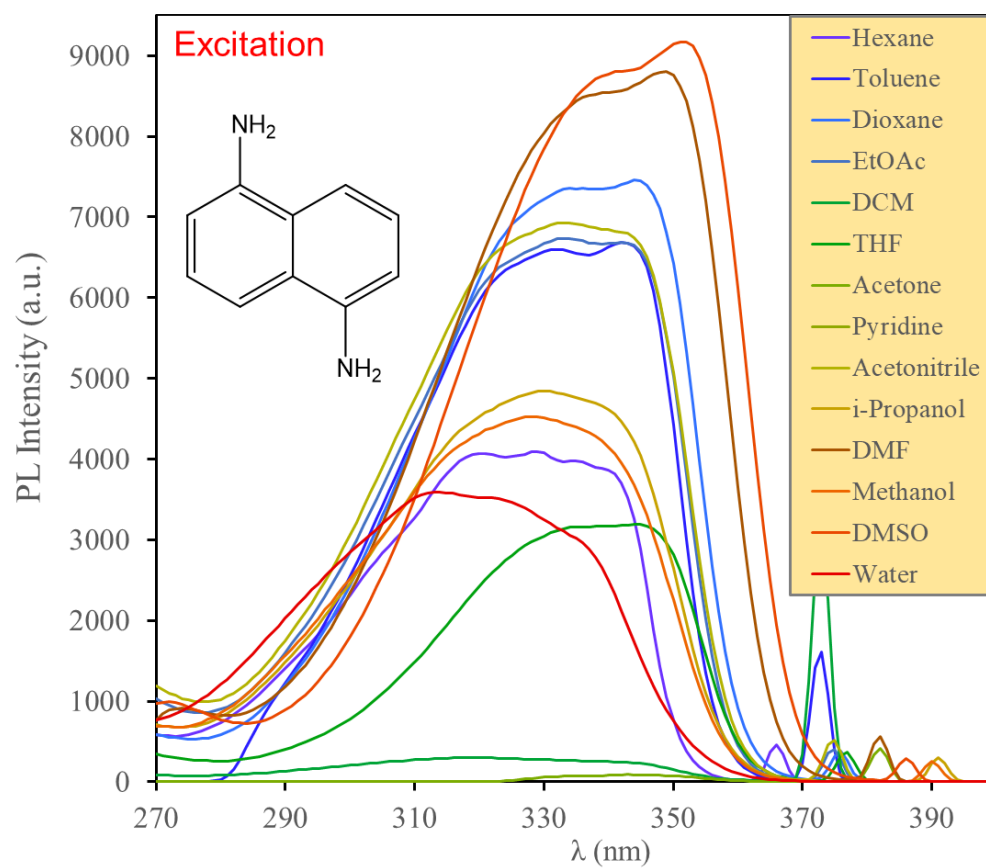

**Figure S2.** Excitation spectra of 1,5-DAN recorded in various solvents of different polarity. ( $[\text{dye}] = 1.05 \times 10^{-5} \text{ M}$ ,  $T = 20 \text{ }^\circ\text{C}$ ).

Emission spectra of 1,5-DAN recorded in alcohols

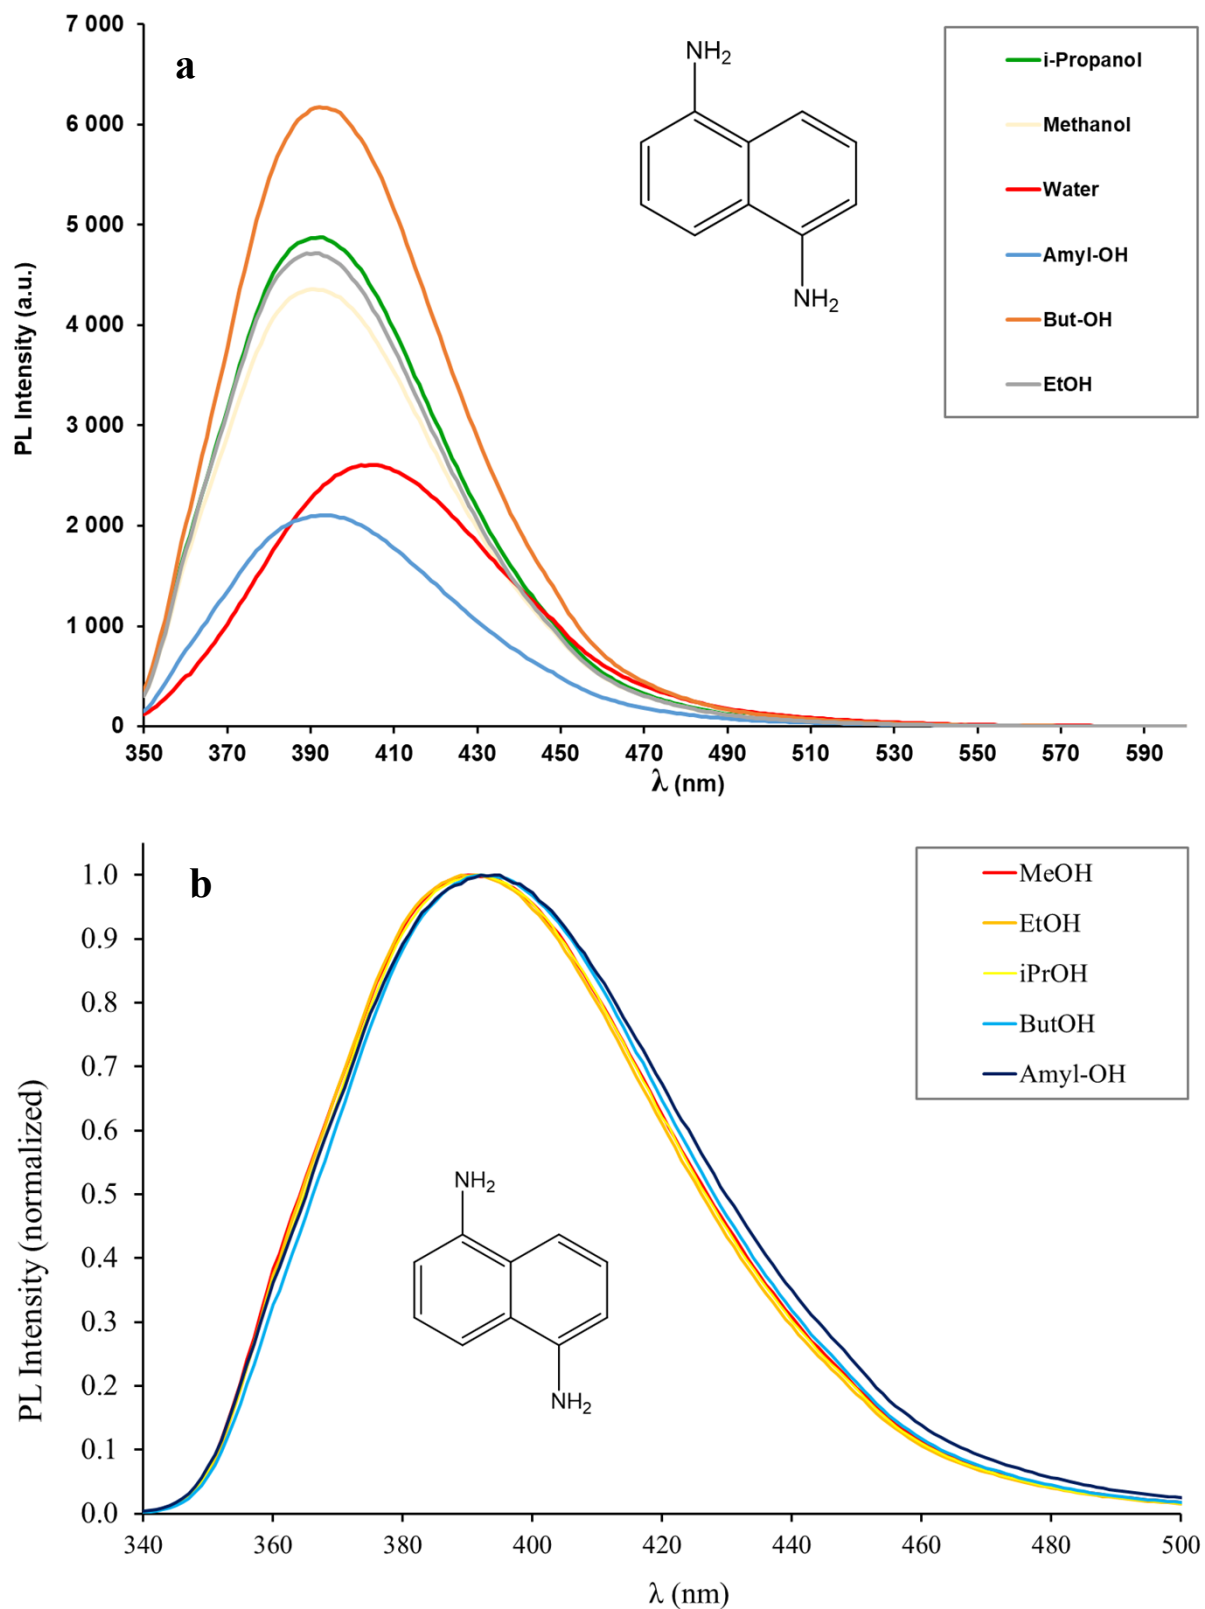

**Figure S3.** (a) Steady-state fluorescence spectra of 1,5-DAN recorded in various primary alcohols. (b) The normalized emission spectra. ( $[dye] = 1.05 \times 10^{-5}$  M,  $T = 20$  °C).

## Fluorescence properties of 1,8-DAN

### Steady state emission spectra

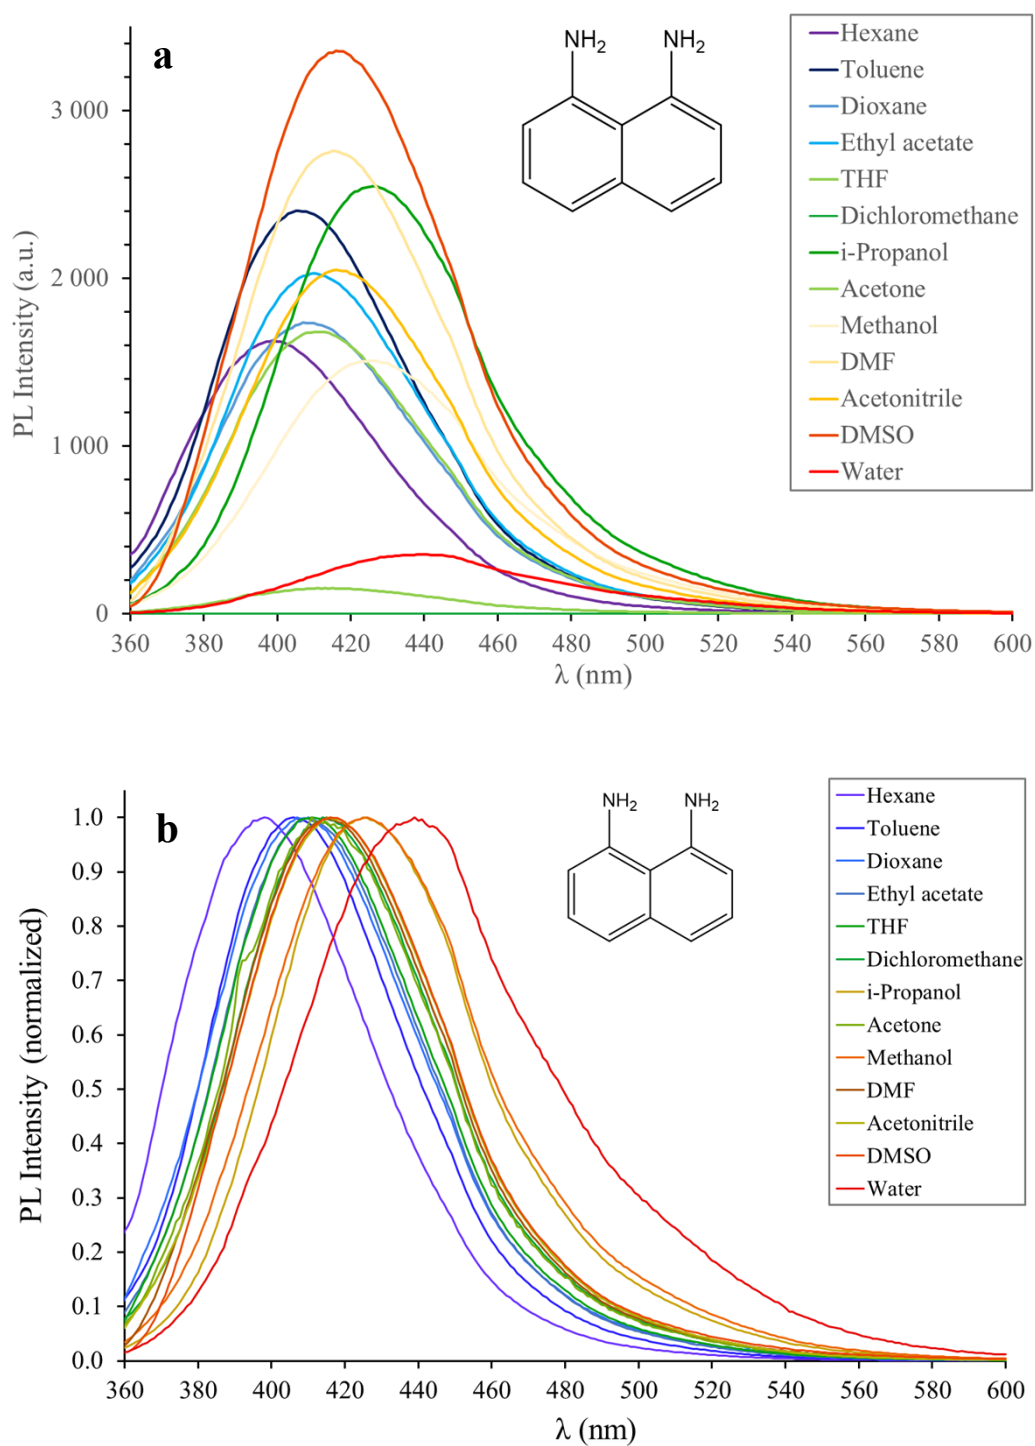

**Figure S4.** (a) Steady-state fluorescence spectra of 1,8-DAN recorded in various solvents of different polarity. (b) The normalized emission spectra. ( $[\text{dye}] = 1.13 \times 10^{-5}$  M,  $T = 20$  °C).



## Excitation spectra of 1,8-DAN

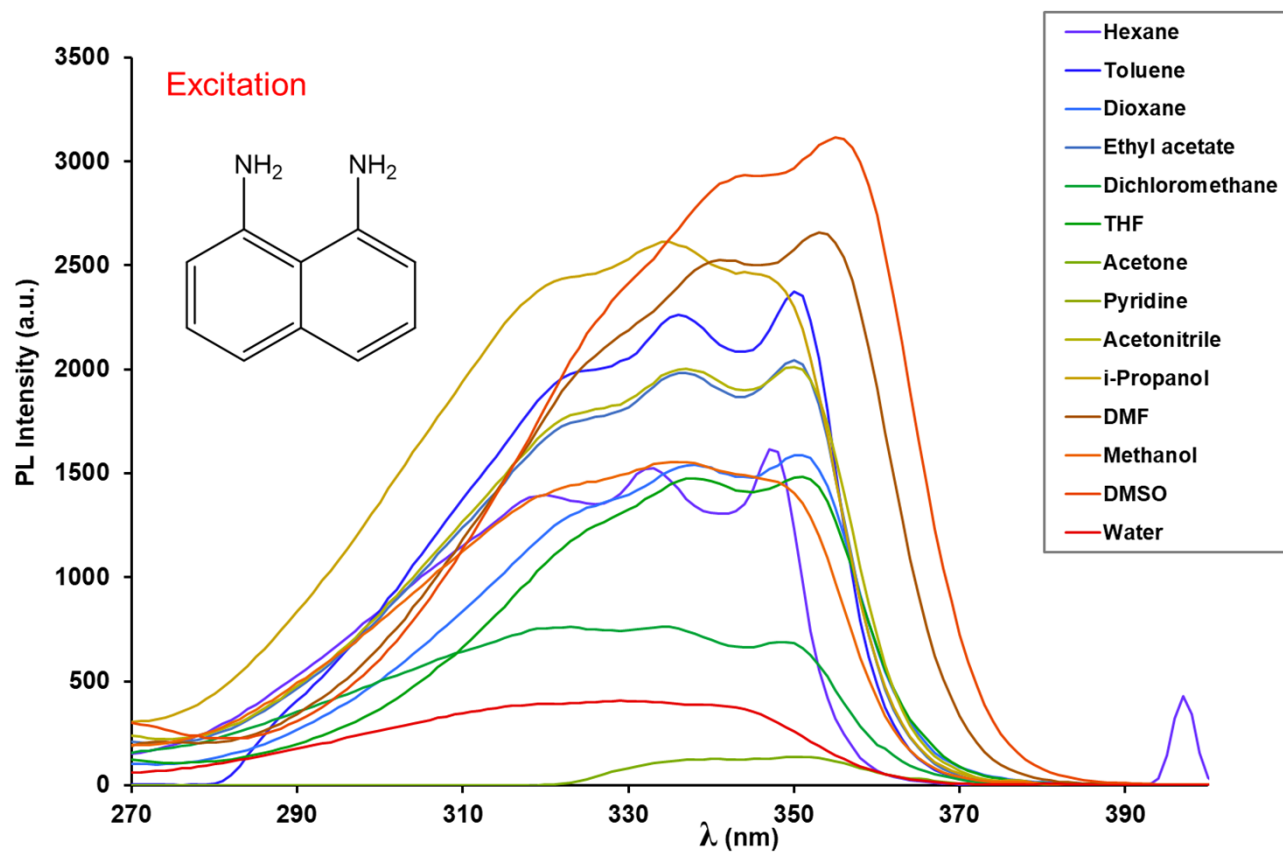

**Figure S5.** Excitation spectra of 1,5-DAN recorded in various solvents of different polarity. ( $[dye] = 1.13 \times 10^{-5}$  M,  $T=20$  °C).

## Emission spectra of 1,8-DAN recorded in alcohols

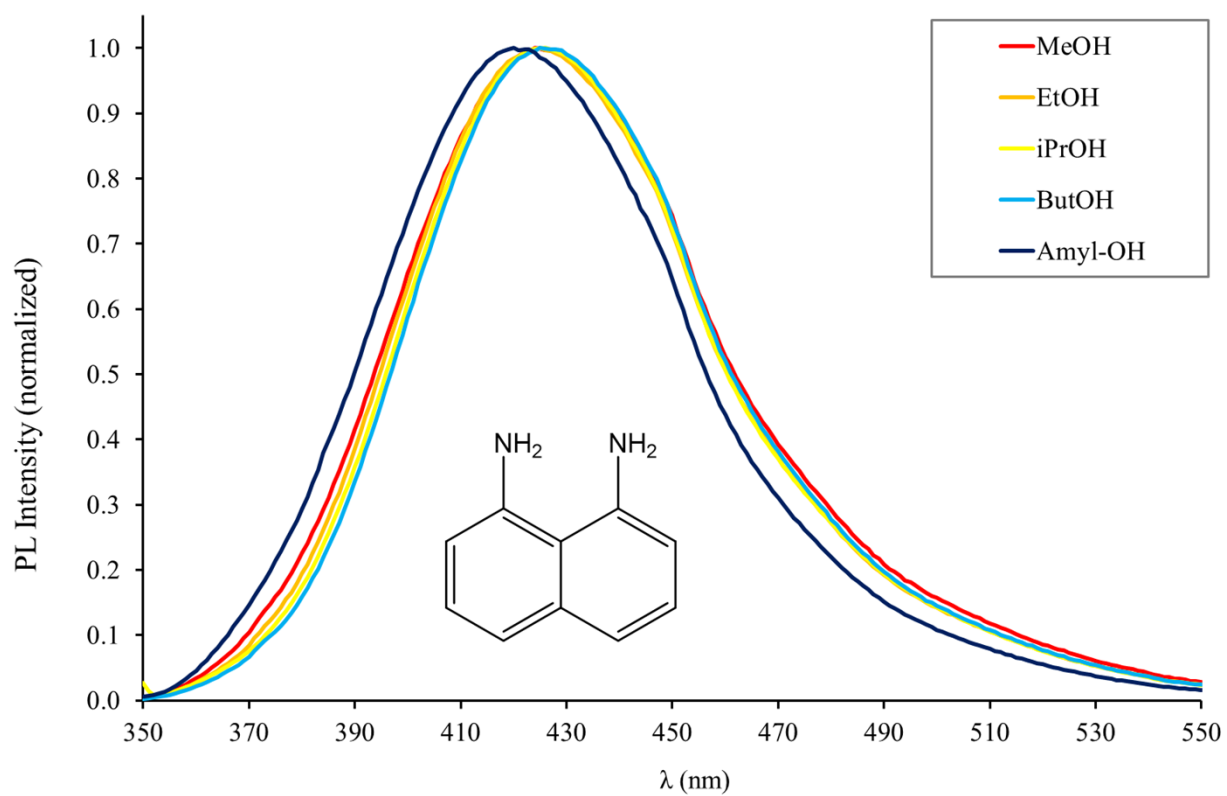

**Figure S6.** Normalized steady-state fluorescence spectra of 1,5-DAN recorded in various primary alcohols. ( $[\text{dye}] = 1.13 \times 10^{-5} \text{ M}$ ,  $T = 20 \text{ }^\circ\text{C}$ ).

## Investigation of the solvatochromic behavior of 1,5-DAN and 1,8-DAN

To study the solvatochromic effect of 1,5- and 1,8-DAN in solvents of different polarity we used Reichardt's method, i.e. we plotted the fluorescence emission maxima ( $\nu_{Em}$ ) as a function of the empirical solvent polarity parameter  $E_T(30)$  [DOI: 10.1021/cr00032a005], which are presented in Figure S7a and b. It is evident from the figure that in both cases the correlation is linear between the fluorescence emission maximum and  $E_T(30)$ . It can be surmised from the corresponding slopes that 1,5-DAN has a larger solvatochromic shift ( $72 \text{ kcal}^{-1}\text{cm}^{-1}\text{mol}$ ), while this value is slightly lower for the 1,8-DAN ( $65 \text{ kcal}^{-1}\text{cm}^{-1}\text{mol}$ ). To account for the specific solvent-dye interactions, i.e. to quantify the solvent effect on the solvatochromic parameters such as emission maxima, and Stokes shifts, multiple linear regression (MLR) analysis employing the Catalan scale [DOI: 10.1021/jp8095727], were used according to the equation:

$$y = y_0 + a_{SA}SA + b_{SB}SB + c_{SP}SP + d_{SdP}SdP \quad (1)$$

where  $y_0$  is the property of the substance of interest (e.g., emission maximum and Stokes shift) in the absence of solvent, for example, in the gas phase. SA is the quantitative empirical measure of the ability of bulk solvent to act as a hydrogen-bond donor towards a solute. SB is the quantitative empirical measure of the ability of a bulk solvent to act as a hydrogen-bond acceptor or electron-pair donor towards a solute, forming a solute-to-solvent hydrogen bond or a solvent-to-solute coordinative bond, respectively. SP and SdP are the solvent polarizability and dipolarity parameters, respectively, determined using reference dye molecules. a, b, c and d are the corresponding coefficients and their inclusion in the equation indicates the dependence of the property under investigation upon the respective solvent parameter. The results are presented in Figure S7c-d and in Table S2. The values of solvatochromic parameters are collected in Table S3.

As seen in Fig.S7b the Catalán equation describes perfectly the specific interactions and based on the data of Table S2 the HB-donor ability (large a coefficient) of the solvent has the largest effect on the solvatochromic behavior, but the effect of solvent polarity is also pronounced.

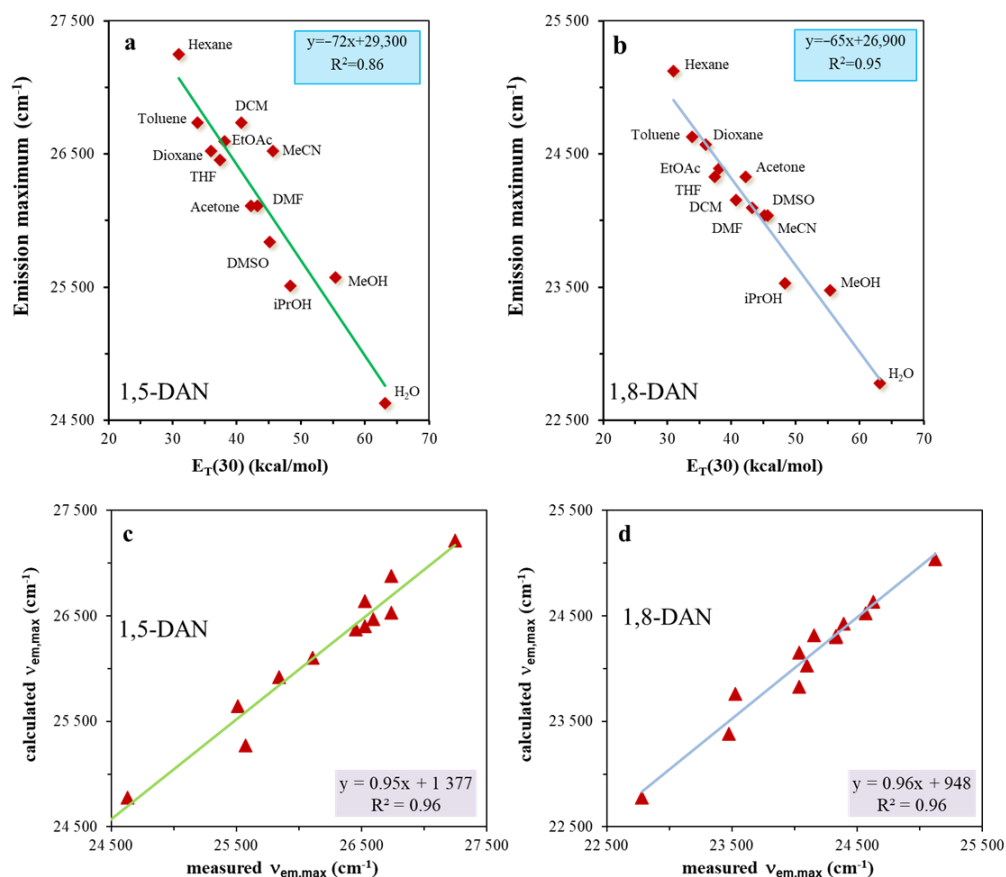

**Figure S7.** Variation of the fluorescence emission maximum with the empirical solvent polarity parameter  $E_T(30)$  (a,b) and the Catalán (c,d) plots for the 1,5- and 1,8-diaminonaphthalenes.

**Table S2.** Solvent-independent correlation coefficients  $a_{SA}$ ,  $b_{SB}$ ,  $c_{SP}$  and  $d_{SdP}$  of the Catalán parameters  $SA$ ,  $SB$ ,  $SP$  and  $SdP$ , respectively, solute property of the reference system (Emission maximum,  $v_{em,max}$  and Stokes-Shift,  $\Delta v_{ss}$ ), correlation coefficient ( $R^2$ ) and number of solvents ( $n$ ) calculated by multiregression analysis for the solvatochromism of 1,5- and 1,8-diaminonaphthalene.

|         |                 | $y_0$ ( $\text{cm}^{-1}$ ) | $a_{SA}$ | $b_{SB}$ | $c_{SP}$ | $d_{SdP}$ | $R^2$ | $n$ |
|---------|-----------------|----------------------------|----------|----------|----------|-----------|-------|-----|
| 1,5-DAN | $v_{em,ma}$     | 27724                      | -1781    | -816     | -753     | -524      | 0.96  | 13  |
|         | $\Delta v_{ss}$ | 4641                       | 3398     | 409      | -1038    | -1298     | 0.96  | 13  |
| 1,8-DAN | $v_{em,ma}$     | 25852                      | -1562    | -485     | -1280    | -536      | 0.96  | 13  |
|         | $\Delta v_{ss}$ | 3856                       | 3684     | 983      | -174     | 41        | 0.96  | 13  |

**Table S3.** The SP, SdP, SA and SB solvent parameters used for constructing Figure 1g,h (Figure S7) using the Catalán equation. *SA* is the quantitative empirical measure of the ability of bulk solvent to act as a hydrogen-bond donor towards a solute. *SB* is the quantitative empirical measure of the ability of a bulk solvent to act as a hydrogen-bond acceptor or electron-pair donor towards a solute, forming a solute-to-solvent hydrogen bond or a solvent-to-solute coordinative bond, respectively. *SP* and *SdP* are the solvent polarizability and dipolarity parameters, respectively. The values were taken from ref.:

J. Catalán, *J. Phys. Chem. B* **2009**, *113*, 5951–5960.

| No | Solvent                   | SP    | SdP   | SA    | SB    |
|----|---------------------------|-------|-------|-------|-------|
| 1  | Hexane                    | 0.616 | 0.000 | 0.000 | 0.056 |
| 2  | Cyclohexane               | 0.683 | 0.000 | 0.000 | 0.073 |
| 3  | Toluene                   | 0.782 | 0.284 | 0.000 | 0.128 |
| 4  | 1,4-dioxane               | 0.737 | 0.312 | 0.000 | 0.444 |
| 5  | Tetrahydrofuran (THF)     | 0.714 | 0.634 | 0.000 | 0.591 |
| 6  | Ethyl acetate             | 0.656 | 0.603 | 0.000 | 0.542 |
| 7  | Dichloromethane           | 0.761 | 0.769 | 0.040 | 0.178 |
| 8  | Chloroform                | 0.783 | 0.614 | 0.047 | 0.071 |
| 9  | Acetone                   | 0.651 | 0.907 | 0.000 | 0.475 |
| 10 | Pyridine                  | 0.842 | 0.761 | 0.033 | 0.581 |
| 11 | Acetonitrile              | 0.645 | 0.974 | 0.044 | 0.286 |
| 12 | Dimethyl formamide (DMF)  | 0.759 | 0.977 | 0.031 | 0.613 |
| 13 | Dimethyl sulfoxide (DMSO) | 0.830 | 1.000 | 0.072 | 0.647 |
| 14 | 2-propanol                | 0.633 | 0.808 | 0.283 | 0.830 |
| 15 | Methanol                  | 0.608 | 0.904 | 0.605 | 0.545 |
| 16 | Water                     | 0.681 | 0.997 | 1.062 | 0.025 |

**Table S4.** The ground ( $S_0$ ) and excited state ( $S_1$ ) geometrical and optical properties of DANS calculated on B3LYP/6-311++G(2d,2p) level in DMSO. Numbers in red represent experimental results.

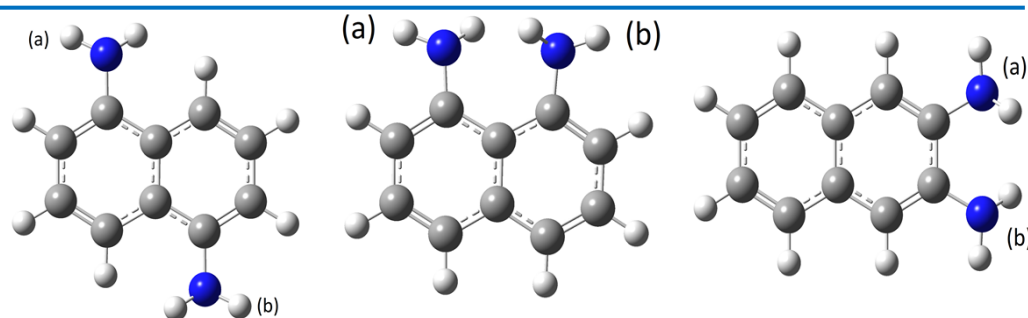

|                  |                           | 1,5-DAN                       |           | 1,8-DAN   |           | 2,3-DAN |        |
|------------------|---------------------------|-------------------------------|-----------|-----------|-----------|---------|--------|
|                  |                           | $S_0$                         | $S_1$     | $S_0$     | $S_1$     | $S_0$   | $S_1$  |
|                  |                           | <b>Bond length (Angstrom)</b> |           |           |           |         |        |
| Implicit solvent | -NH <sub>2</sub> (a)      | 1.396                         | 1.380     | 1.404     | 1.344     | 1.402   | 1.428  |
|                  | -NH <sub>2</sub> (b)      | 1.397                         | 1.380     | 1.404     | 1.450     | 1.402   | 1.348  |
|                  | abs (nm)                  | 333 (351)                     | 399 (387) | 337 (355) | 423 (416) | 313     | 380    |
|                  | Osc. Str                  | 0.1989                        | 0.3133    | 0.1375    | 0.1583    | 0.1384  | 0.1934 |
|                  | NH <sub>2</sub> angle (a) | 340                           | 348       | 338       | 328       | 338     | 331    |
|                  | NH <sub>2</sub> angle (b) | 340                           | 348       | 338       | 360       | 338     | 359    |
|                  |                           | <b>Bond length (Angstrom)</b> |           |           |           |         |        |
| Explicit solvent | -NH <sub>2</sub> (a)      | 1.384                         | 1.372     | 1.392     | 1.413     | 1.395   | 1.409  |
|                  | -NH <sub>2</sub> (b)      | 1.386                         | 1.366     | 1.393     | 1.357     | 1.395   | 1.349  |
|                  | abs (nm)                  | 344                           | 411       | 339       | 406       | 328     | 379    |
|                  | Osc. Str                  | 0.2647                        | 0.3621    | 0.1875    | 0.2274    | 0.2107  | 0.2961 |
|                  | NH <sub>2</sub> angle (a) | 347                           | 354       | 340       | 335       | 340     | 335    |
|                  | NH <sub>2</sub> angle (b) | 346                           | 358       | 340       | 359       | 340     | 360    |

## Theoretical results

Theoretical calculations were carried out by Gaussian16 software [1], using the standard convergence criteria given as default. Optimization and vibrational frequencies were carried out by the B3LYP method [2,3] using the 6-311++G(2d,2p) basis set and the IEFPCM method for implicit solvent model. Thermodynamic functions were computed at 298.15 K. For wavelength prediction, the vertical excitation was modelled by the TD-B3LYP/6-311++G(2d,2p)//PCM(solvent)[4] level of theory using the geometries optimized at B3LYP/6-311++G(2d,2p)//PCM(solvent). The emission wavelengths were calculated after optimization using geometries provided by

TD-B3LYP/6-311++G(2d,2p)//PCM(solvent).

Ref:

1 M. J. Frisch, G. W. Trucks, H. B. Schlegel, G. E. Scuseria, M. A. Robb, J. R. Cheeseman, G. Scalmani, V. Barone, B. Mennucci, G. A. Petersson, H. Nakatsuji, M. Caricato, X. Li, H. P. Hratchian, A. F. Izmaylov, J. Bloino, G. Zheng, J. L. Sonnenberg, M. Hada, M. Ehara, K. Toyota, R. Fukuda, J. Hasegawa, M. Ishida, T. Nakajima, Y. Honda, O. Kitao, H. Nakai, T. Vreven, J. A. Montgomery Jr., J. E. Peralta, F. Ogliaro, M. Bearpark, J. J. Heyd, E. Brothers, K. N. Kudin, V. N. Staroverov, R. Kobayashi, J. Normand, K. Raghavachari, A. Rendell, J. C. Burant, S. S. Iyengar, J. Tomasi, M. Cossi, N. Rega, J. M. Millam, M. Klene, J. E. Knox, J. B. Cross, V. Bakken, C. Adamo, J. Jaramillo, R. Gomperts, R. E. Stratmann, O. Yazyev, A. J. Austin, R. Cammi, C. Pomelli, J. W. Ochterski, R. L. Martin, K. Morokuma, V. G. Zakrzewski, G. A. Voth, P. Salvador, J. J. Dannenberg, S. Dapprich, A. D. Daniels, Ö. Farkas, J. B. Foresman, J. V. Ortiz, J. Cioslowski and D. J. Fox, Gaussian Inc Wallingford CT, 2016.

2 Y. Zhao and D. G. Truhlar, *Theor. Chem. Acc.*, 2008, 120, 215–241.

3 A. D. Becke, *J. Chem. Phys.*, 1993, 98, 5648–5652.

4 J. Tomasi, B. Mennucci and R. Cammi, *Chem. Rev.*, 2005, 105, 2999–3094.

A)

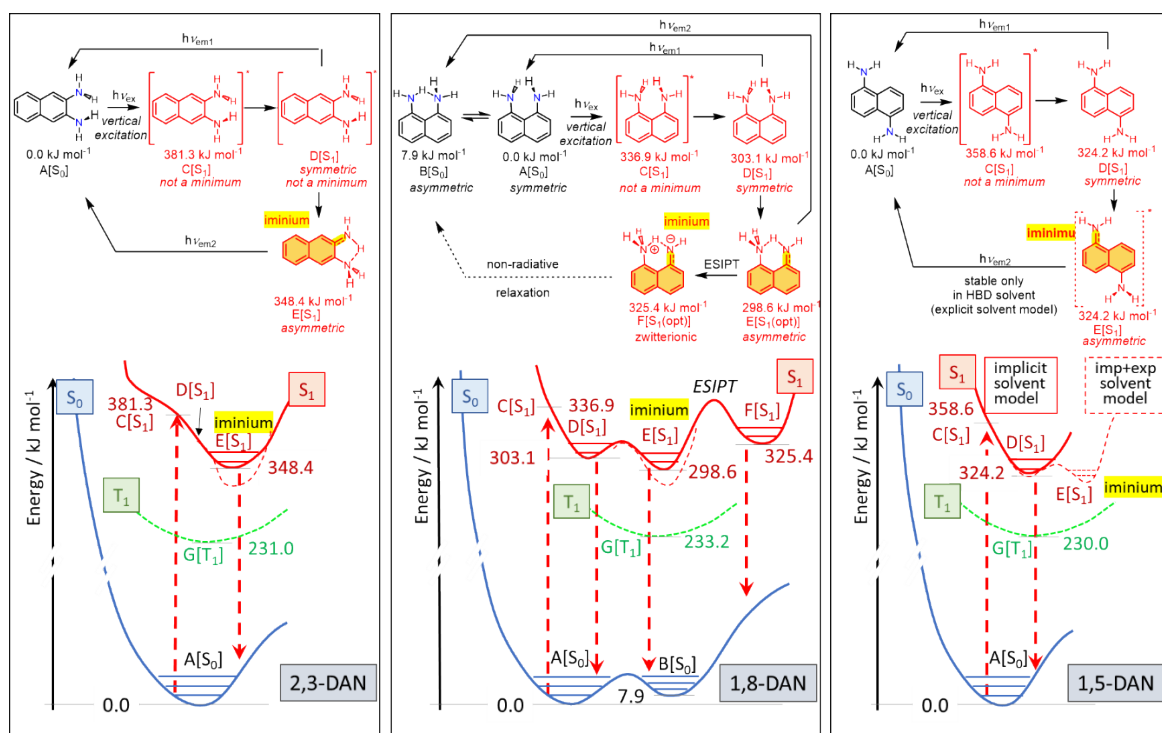

In the case of 2,3-DAN, the symmetrical ground state form (A[S<sub>0</sub>]) undergoes a structural rearrangement upon excitation and the subsequent relaxation (C[S<sub>1</sub>]→E[S<sub>1</sub>]), resulting asymmetrical structure, skipping the symmetrical state of D[S<sub>1</sub>]. At state E[S<sub>1</sub>], one of the amino groups form an electron withdrawing quasi iminium group (sp<sup>2</sup>), which makes strong HB with another sp<sup>3</sup> amino group (Figure S8A). The vertical excitation of 2,3-DAN A[S<sub>0</sub>]→C[S<sub>1</sub>] exhibits a single dominant excitation such as HOMO→LUMO (313 nm; f=0.1384).

B)

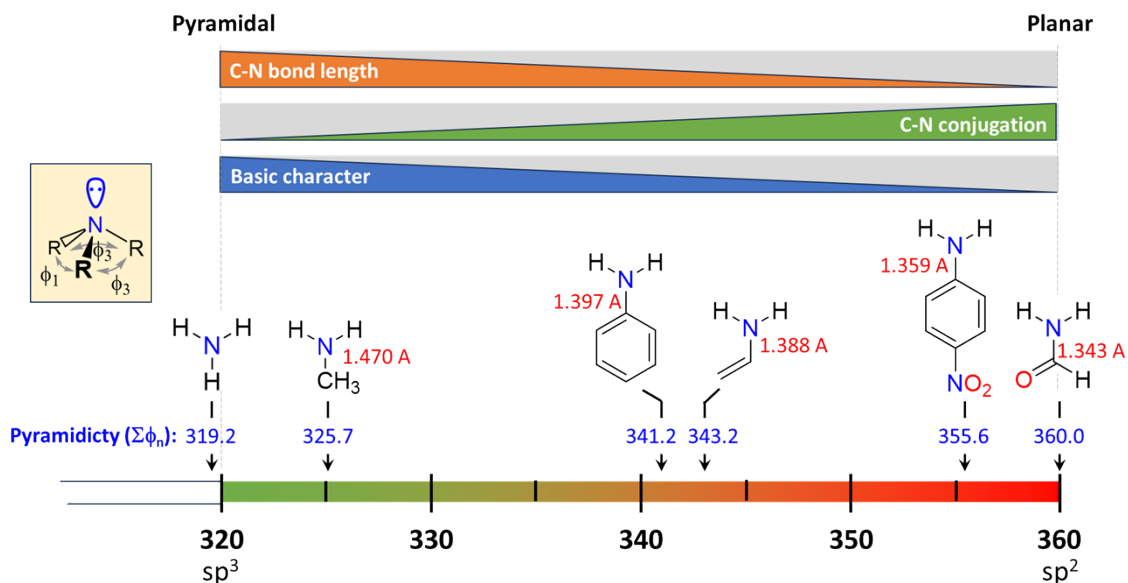

**Figure S8.** A) The calculated photochemical mechanisms and the corresponding potential energy surfaces (PES) of the ground (blue line, S<sub>0</sub>), excited (red line, S<sub>1</sub>) and triplet states (green line, T<sub>1</sub>) of 2,3-DAN, 1,8-DAN and 1,5-DAN computed at B3LYP/6-311++G(2d,2p)/PCM(DMSO) at S<sub>0</sub> state and TD-B3LYP/6-311++G(2d,2p)/PCM(DMSO) at S<sub>1</sub> state.

B) Definition of Pyramidity explained by various amine derivatives as examples.



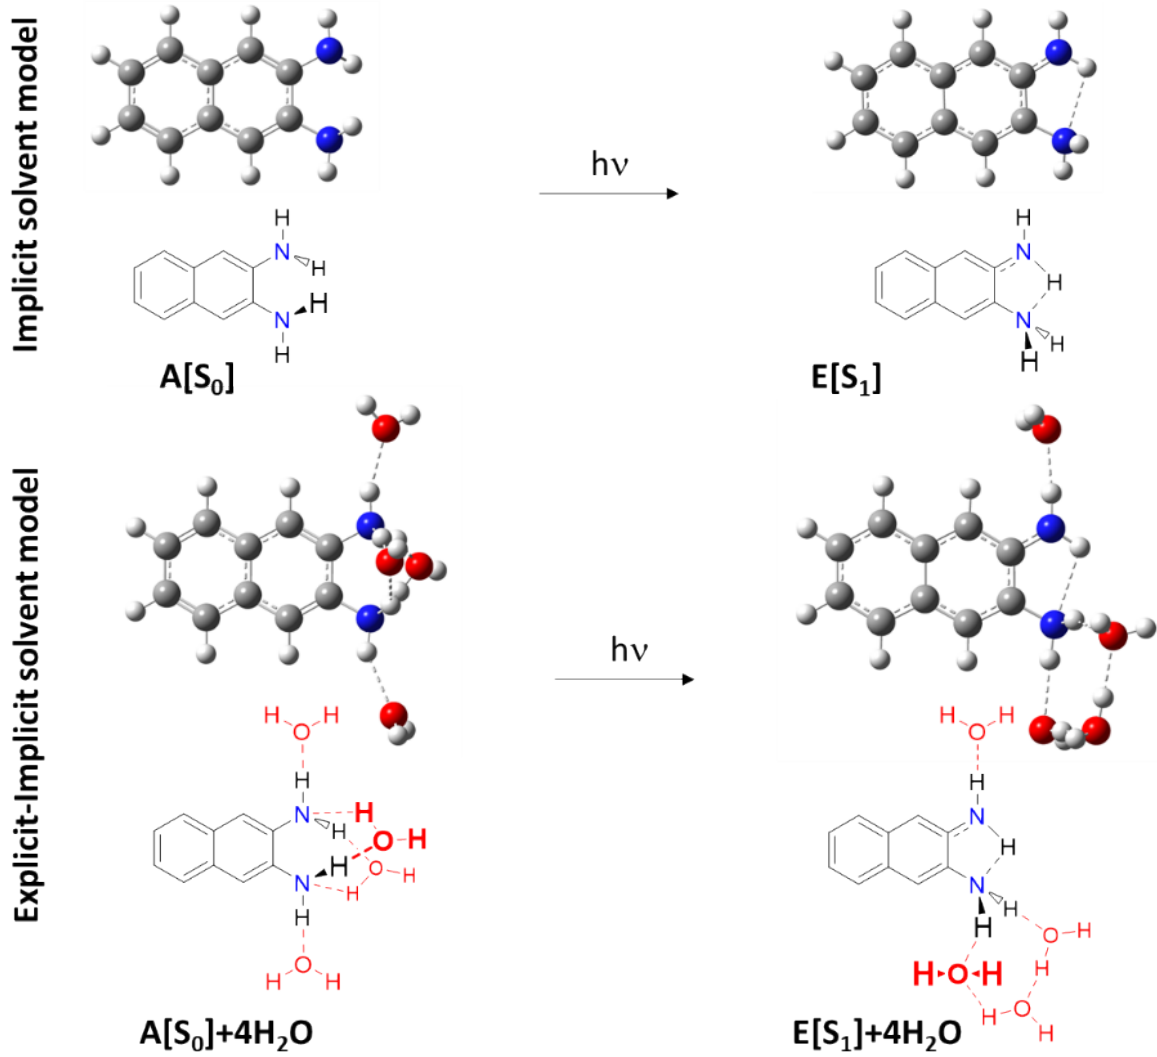

Fig. S9. 3D geometries and 2D representations of 2,3-DAN at S<sub>0</sub> and S<sub>1</sub> states.

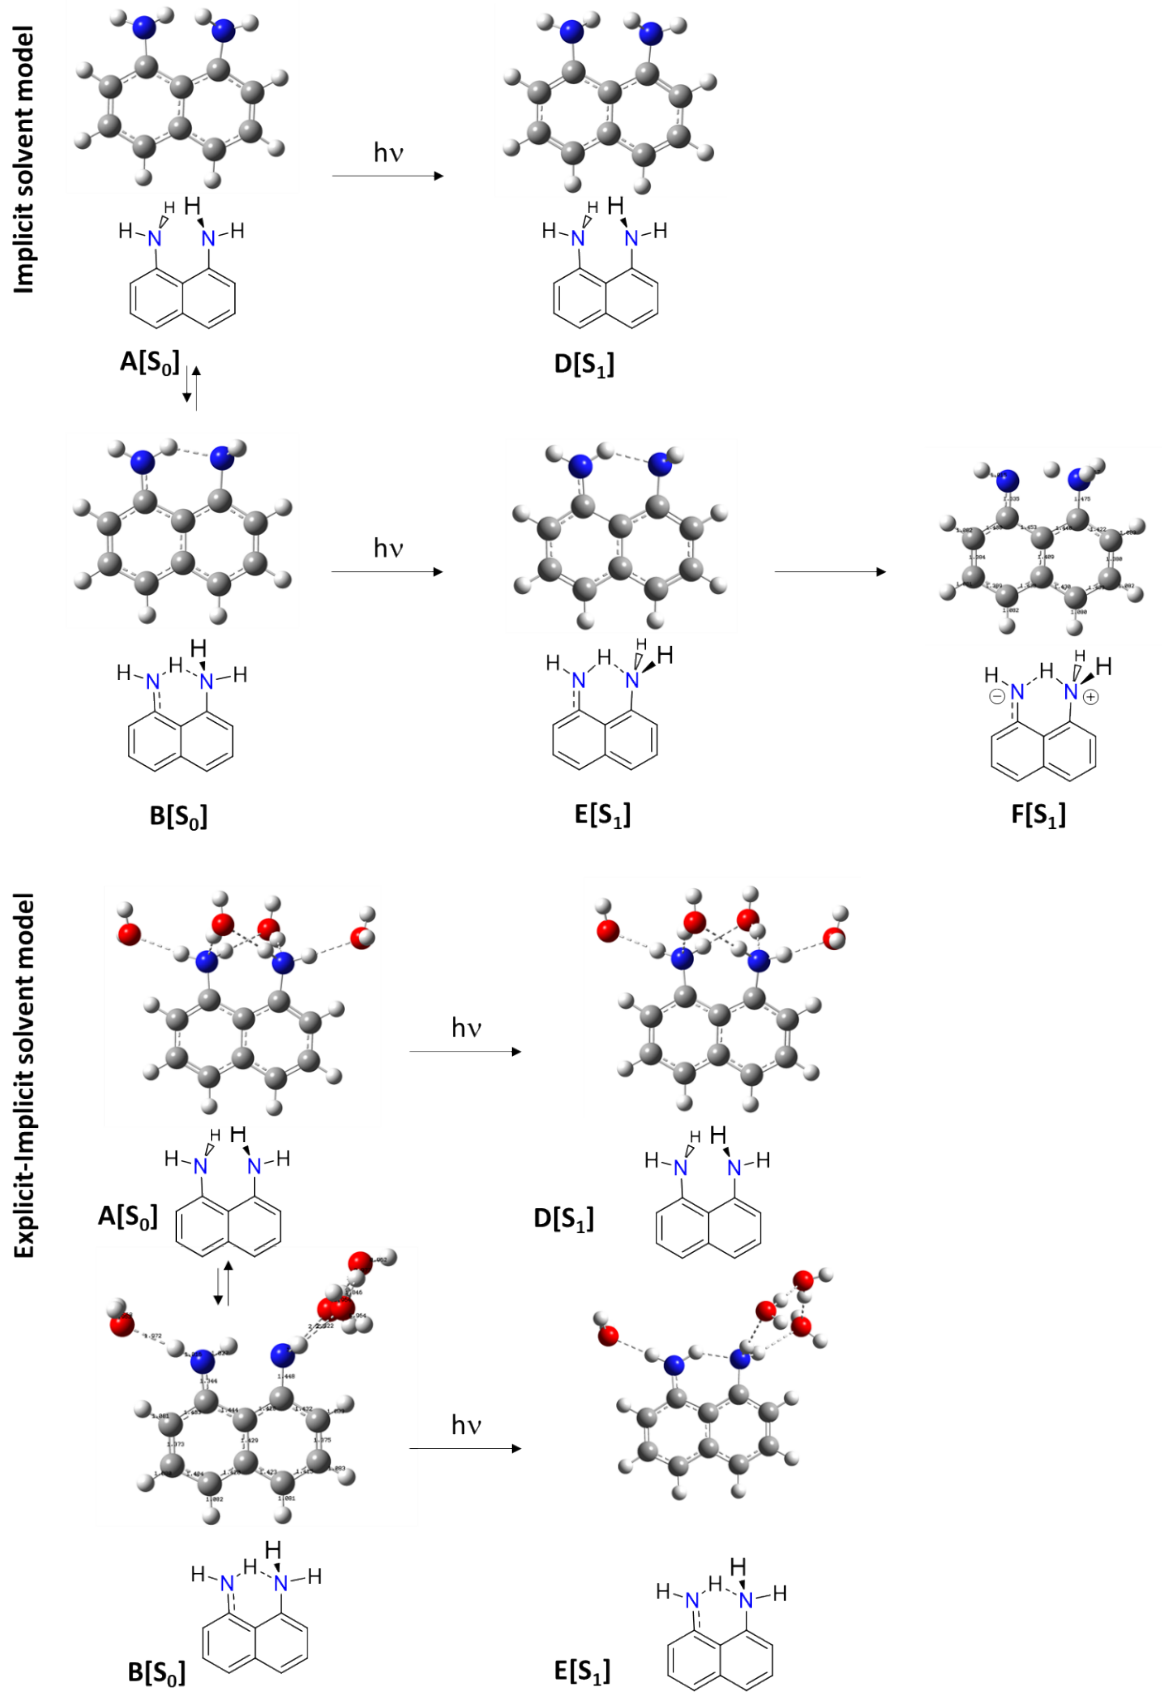

**Fig. S10.** Various 3D geometries and 2D representations of 1,8-DAN at  $S_0$  and  $S_1$  states.

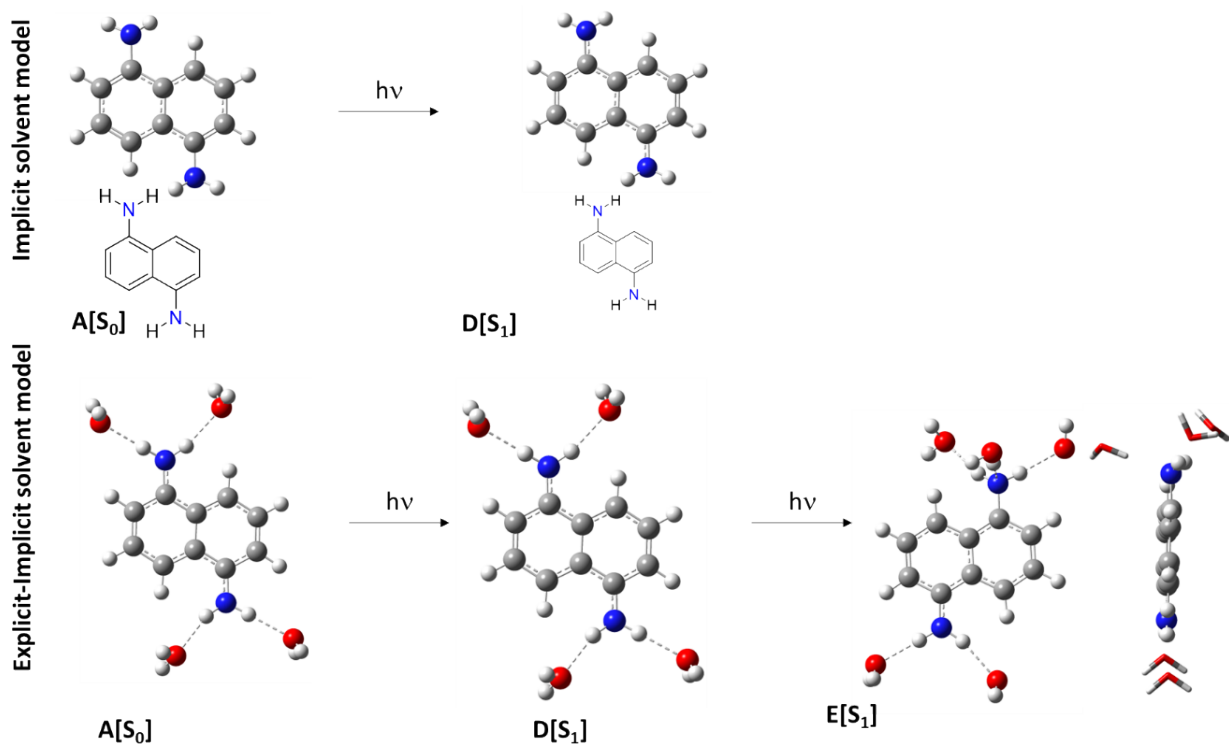

**Fig. S11.** Various 3D geometries and 2D representations of 1,5-DAN at  $S_0$  and  $S_1$  states.

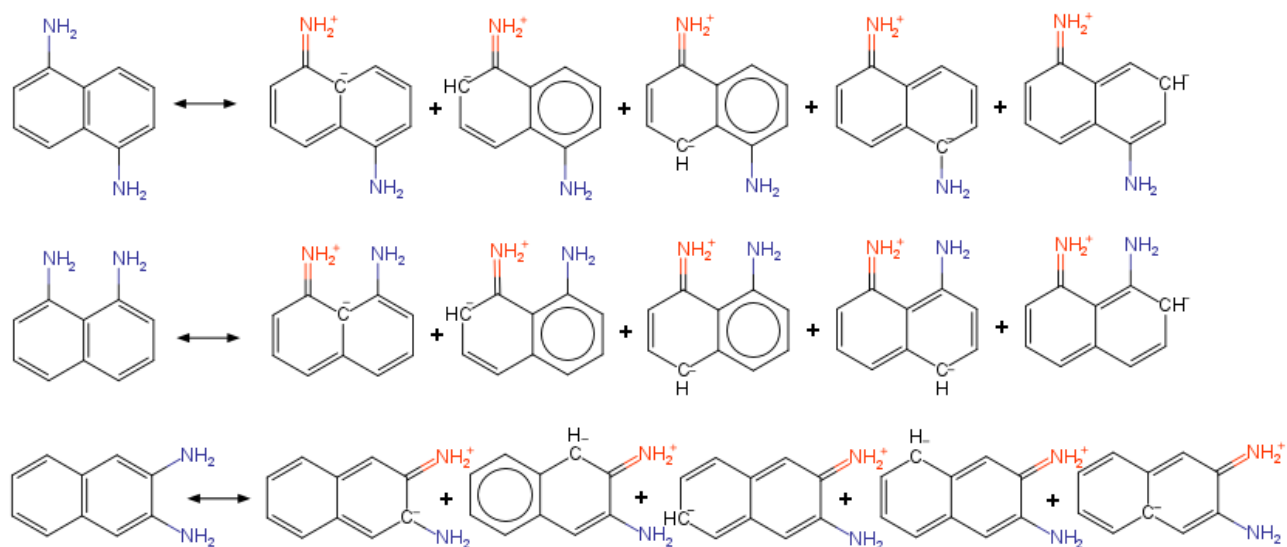

**Figure S12.** The suggested resonance structures of 1,5-DAN, 1,8-DAN and 2,3-DAN respectively calculated by MarvinSketch software.

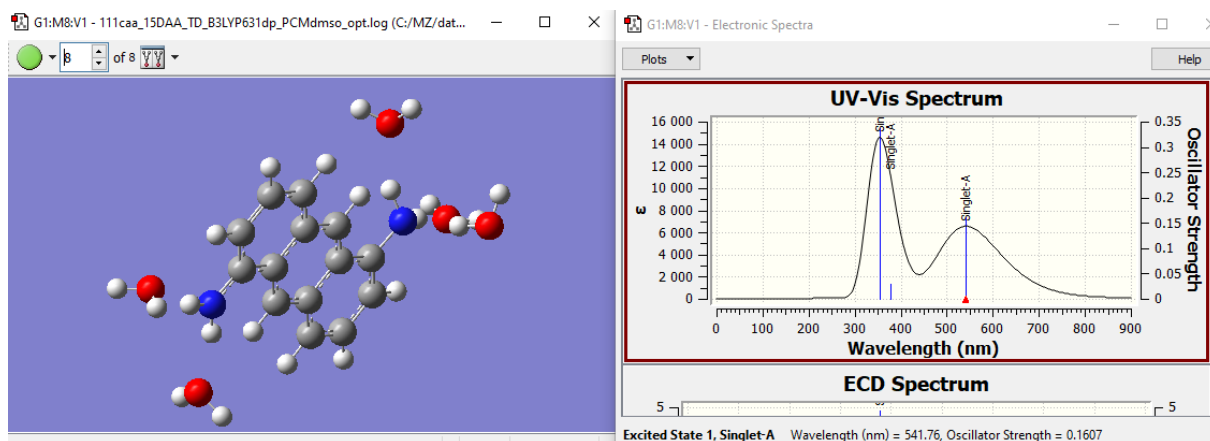

**Fig. S13.** The optimized structure and emission spectrum of 1,5-diaminoanthracene in  $S_1$  state, calculated using the implicit-explicit solvent model.

The solvatochromic behavior of 1,5-diaminoanthracene is described in:

Nagy, M.; Fiser, B.; Szóri, M.; Vanyorek, L.; Viskolez, B. Optical Study of Solvatochromic Isocyanoaminoanthracene Dyes and 1,5-Diaminoanthracene. *Int. J. Mol. Sci.* **2022**, *23*, 1315. <https://doi.org/10.3390/ijms23031315>

## Raw computational data

**Table S5.** Computed energies ( $E$ ), zero point energies, internal energies ( $U$ ), enthalpies ( $H$ ) and Gibbs free energies ( $G$ ) given in Hartree as well as entropies ( $S$ ) given in  $\text{J mol}^{-1} \text{K}^{-1}$  at B3LYP/6-311++G(2d,2p) basis set with the consideration of PCM solvent method using the parameter set of water for compound 2,3-DAN.

| Conformer | Filename                                                    | E              | ZPE          | U            | H            | G            | S       |
|-----------|-------------------------------------------------------------|----------------|--------------|--------------|--------------|--------------|---------|
| S0        | 0001aaa_23-diaminonaftalin_B3lyp6311++2d2pPCMdmsolog        | -496.77131495  | -496.590541  | -496.580991  | -496.580047  | -496.624715  | 94.013  |
| S0        | 0001aaf_23-diaminonaftalin_B3lyp6311++2d2pPCMWolog          | -496.77147971  | -496.590708  | -496.581161  | -496.580217  | -496.624880  | 94.002  |
| S0        | 0001aam_23-diaminonaftalin_+4HOH_B3lyp6311++2d2p_PCMWolog   | -802.31368346  | -802.034657  | -802.010743  | -802.009799  | -802.090987  | 170.876 |
| S1        | 0001baf_23-diaminonaftalin_TD_B3lyp6311++2d2pPCMW_soptolog  | -496.75861401  |              |              |              |              |         |
| S1        | 0001caa_23-diaminonaftalin_TD_B3lyp6311++2d2pPCMdmsolog     | -496.75832374  |              |              |              |              |         |
| S0        | 0011aaa_23-diaminonaftalin_+4HOH_B3lyp6311++2d2p_PCMWolog   | -802.66689847  | -802.391330  | -802.366773  | -802.365829  | -802.451235  | 179.751 |
| S0        | 0021cba_23-diaminonaftalin_+3DMSO_B3lyp6311++2d2pPCMdmsolog | -2709.99251136 | -2709.491064 | -2709.450887 | -2709.449943 | -2709.578419 | 270.401 |

**Table S6.** Computed energies ( $E$ ), zero point energies, internal energies ( $U$ ), enthalpies ( $H$ ) and Gibbs free energies ( $G$ ) given in Hartree as well as entropies ( $S$ ) given in  $\text{J mol}^{-1} \text{K}^{-1}$  at B3LYP/6-311++G(2d,2p) basis set with the consideration of PCM solvent method using the parameter set of water for compound 1,8-DAN.

| Conformer | Filename                                                     | E              | ZPE          | U            | H            | G            | S       |
|-----------|--------------------------------------------------------------|----------------|--------------|--------------|--------------|--------------|---------|
| S0        | 0401aaa_1_8_DAN_b3lyp6311++2d2p_PCMdmsolog                   | -496.76106693  | -496.580585  | -496.570942  | -496.569998  | -496.614805  | 94.305  |
| S1        | 0401aaa_1_8_DAN_TD_b3lyp6311++2d2p_PCMdmsolog                | -496.74818804  |              |              |              |              |         |
| S0        | 0401aabm_1_8_DAN_b3lyp6311++2d2p_PCMWolog                    | -496.76423303  | -496.583066  | -496.573608  | -496.572664  | -496.617218  | 93.771  |
| S1        | 0401aabm_1_8_DAN_TD_b3lyp6311++2d2p_PCMWolog                 | -496.75428513  |              |              |              |              |         |
| S1        | 0401aac_1_8_DAN_protontransfer_TD_b3lyp6311++2d2p_PCMdmsolog | -496.70995372  |              |              |              |              |         |
| S1        | 0401aacm_1_8_DAN_protontransfer_TD_b3lyp6311++2d2p_PCMWolog  | -496.71041959  |              |              |              |              |         |
| S1        | 0401acaa_1_8_DAN_b3lyp6311++2d2p_PCMwaterolog                | -496.75695063  | -496.577880  | -496.569228  | -496.568283  | -496.611337  | 90.614  |
| S1        | 0401acam_1_8_DAN_TD_b3lyp6311++2d2p_PCMWolog                 | -496.74834035  |              |              |              |              |         |
| S1        | 0401acb_1_8_DAN_TD_b3lyp6311++2d2p_PCMdmsolog                | -496.75419098  |              |              |              |              |         |
| S1        | 0401ada_1_8_DAN_b3lyp6311++2d2p_PCMdmsolog                   | -496.67518396  |              |              |              |              |         |
| T1        | 0401facm_1_8_DAN_protontransfer_b3lyp6311++2d2p_PCMdmsolog   | -496.65318076  |              |              |              |              |         |
| S0        | 0406dab_1_8_DAN+4DMSO_b3lyp6311++2d2p_PCMdmsolog             | -2709.98287096 | -2709.481795 | -2709.441346 | -2709.440402 | -2709.569073 | 270.812 |
| S1        | 0406qbb_1_8_DAN_HB_+4HOH_TD_b3lyp6311++2d2pdp_PCMWolog       | -802.64467639  |              |              |              |              |         |
| S1        | 0406qcb_1_8_DAN+4HOH_TD_sym_b3lyp6311++2d2p_PCMWolog         | -802.64763954  |              |              |              |              |         |

**Table S7.** Computed energies ( $E$ ), zero point energies, internal energies ( $U$ ), enthalpies ( $H$ ) and Gibbs free energies ( $G$ ) given in Hartree as well as entropies ( $S$ ) given in  $\text{J mol}^{-1} \text{K}^{-1}$  at B3LYP/6-311++G(2d,2p) basis set with the consideration of PCM solvent method using the parameter set of water for compound 1,5-DAN.

| Conformer | Filename                                                     | E              | ZPE          | U            | H            | G            | S       |
|-----------|--------------------------------------------------------------|----------------|--------------|--------------|--------------|--------------|---------|
| S0        | 0402aaa_1_5_DAN_b3lyp6311++2d2p_PCMdmsol.log                 | -496.76850128  | -496.587860  | -496.578189  | -496.577245  | -496.622127  | 94.464  |
| T1        | 0402ada_1_5_DAN_b3lyp6311++2d2p_PCMdmsol_TRIPLET.log         | -496.68081920  |              |              |              |              |         |
| S1        | 0412aaam_1_5_DAN_b3lyp6311++2d2p_PCMw_NOsymm.log             | -496.76874662  | -496.588037  | -496.578401  | -496.577457  | -496.622238  | 94.251  |
| S1        | 0412baaa_1_5_DAN_TD_b3lyp6311++2d2p_PCMdmsol_NOsymm_opt.log  | -496.75923322  |              |              |              |              |         |
| S1        | 0412baaam_1_5_DAN_TD_b3lyp6311++2d2p_PCMw_NOsymm_opt.log     | -496.75941823  |              |              |              |              |         |
| S0        | 0413caa_1_5_DAN_4DMSO_b3lyp6311++2d2p_PCMdmsol.log           | -2709.99009880 | -2709.489343 | -2709.448603 | -2709.447658 | -2709.579619 | 277.734 |
| S1        | 0413cca_1_5_DAN_4DMSO_TD_b3lyp6311++2d2p_PCMdmsol_opt.log    | -2709.98151025 |              |              |              |              |         |
| S1        | 0413qdab_1_5_DAN_5HOH_TD_b3lyp6311++2d2p_PCMw_sopt_assym.log | -879.12288478  |              |              |              |              |         |

## The xyz coordinates of computed geometries

0001aaa\_23-diaminonaftalin\_B3lyp6311++2d2pPCMdms0.log

Standard orientation:

| Center<br>Number | Atomic<br>Number | Atomic<br>Type | Coordinates (Angstroms) |           |           |
|------------------|------------------|----------------|-------------------------|-----------|-----------|
|                  |                  |                | X                       | Y         | Z         |
| 1                | 6                | 0              | 3.154866                | 0.706191  | -0.010645 |
| 2                | 6                | 0              | 1.966288                | 1.397699  | -0.022022 |
| 3                | 6                | 0              | 0.724679                | 0.714220  | -0.011795 |
| 4                | 6                | 0              | 0.724660                | -0.714224 | 0.011744  |
| 5                | 6                | 0              | 1.966305                | -1.397678 | 0.022031  |
| 6                | 6                | 0              | 3.154862                | -0.706137 | 0.010713  |
| 7                | 1                | 0              | -0.522340               | 2.477538  | -0.004569 |
| 8                | 1                | 0              | 4.094046                | 1.242694  | -0.018323 |
| 9                | 1                | 0              | 1.965904                | 2.480384  | -0.038029 |
| 10               | 6                | 0              | -0.517767               | 1.394252  | -0.008911 |
| 11               | 6                | 0              | -0.517730               | -1.394298 | 0.008825  |
| 12               | 1                | 0              | 1.965960                | -2.480361 | 0.038068  |
| 13               | 1                | 0              | 4.094045                | -1.242636 | 0.018448  |
| 14               | 6                | 0              | -1.715098               | -0.717426 | -0.004939 |
| 15               | 6                | 0              | -1.715036               | 0.717331  | 0.004905  |
| 16               | 1                | 0              | -0.522240               | -2.477590 | 0.004376  |
| 17               | 7                | 0              | -2.952146               | -1.374698 | 0.040559  |
| 18               | 1                | 0              | -3.660597               | -0.957994 | -0.548340 |
| 19               | 1                | 0              | -2.889945               | -2.366211 | -0.138044 |
| 20               | 7                | 0              | -2.952351               | 1.374647  | -0.040653 |
| 21               | 1                | 0              | -3.659875               | 0.958703  | 0.550035  |
| 22               | 1                | 0              | -2.889648               | 2.366243  | 0.137610  |

0001aaf\_23-diaminonaftalin\_B3lyp6311++2d2pPCMw.log

Standard orientation:

| Center<br>Number | Atomic<br>Number | Atomic<br>Type | Coordinates (Angstroms) |           |           |
|------------------|------------------|----------------|-------------------------|-----------|-----------|
|                  |                  |                | X                       | Y         | Z         |
| 1                | 6                | 0              | -3.154918               | -0.706210 | -0.010572 |
| 2                | 6                | 0              | -1.966322               | -1.397736 | -0.021769 |
| 3                | 6                | 0              | -0.724668               | -0.714254 | -0.011635 |
| 4                | 6                | 0              | -0.724659               | 0.714264  | 0.011615  |
| 5                | 6                | 0              | -1.966345               | 1.397716  | 0.021722  |
| 6                | 6                | 0              | -3.154919               | 0.706159  | 0.010500  |
| 7                | 1                | 0              | 0.522389                | -2.477539 | -0.004106 |
| 8                | 1                | 0              | -4.094070               | -1.242718 | -0.018189 |
| 9                | 1                | 0              | -1.965956               | -2.480401 | -0.037575 |
| 10               | 6                | 0              | 0.517751                | -1.394278 | -0.008597 |
| 11               | 6                | 0              | 0.517721                | 1.394324  | 0.008637  |
| 12               | 1                | 0              | -1.966015               | 2.480380  | 0.037535  |
| 13               | 1                | 0              | -4.094078               | 1.242657  | 0.018098  |
| 14               | 6                | 0              | 1.715152                | 0.717454  | -0.004934 |
| 15               | 6                | 0              | 1.715118                | -0.717379 | 0.005001  |
| 16               | 1                | 0              | 0.522319                | 2.477587  | 0.004110  |
| 17               | 7                | 0              | 2.952118                | 1.374785  | 0.041194  |
| 18               | 1                | 0              | 3.661004                | 0.958242  | -0.547436 |
| 19               | 1                | 0              | 2.890004                | 2.366357  | -0.137538 |
| 20               | 7                | 0              | 2.952261                | -1.374731 | -0.041251 |
| 21               | 1                | 0              | 3.660517                | -0.958914 | 0.548717  |
| 22               | 1                | 0              | 2.889769                | -2.366399 | 0.136972  |

0001aam\_23-diaminonaftalin\_+4HOH\_B3lyp6311++2d2p\_PCMw.log

Standard orientation:

| Center<br>Number | Atomic<br>Number | Atomic<br>Type | Coordinates (Angstroms) |           |           |
|------------------|------------------|----------------|-------------------------|-----------|-----------|
|                  |                  |                | X                       | Y         | Z         |
| 1                | 6                | 0              | -4.215672               | -0.705421 | -0.027776 |
| 2                | 6                | 0              | -3.032215               | -1.394522 | -0.055558 |
| 3                | 6                | 0              | -1.792760               | -0.708462 | -0.028647 |
| 4                | 6                | 0              | -1.792498               | 0.709072  | 0.029112  |
| 5                | 6                | 0              | -3.031706               | 1.395579  | 0.056033  |
| 6                | 6                | 0              | -4.215413               | 0.706902  | 0.028265  |
| 7                | 1                | 0              | -0.543499               | -2.475409 | -0.054350 |
| 8                | 1                | 0              | -5.155213               | -1.239962 | -0.048676 |
| 9                | 1                | 0              | -3.027850               | -2.476359 | -0.097702 |
| 10               | 6                | 0              | -0.552197               | -1.392324 | -0.038890 |
| 11               | 6                | 0              | -0.551678               | 1.392472  | 0.039337  |
| 12               | 1                | 0              | -3.026963               | 2.477415  | 0.098178  |
| 13               | 1                | 0              | -5.154755               | 1.241792  | 0.049174  |
| 14               | 6                | 0              | 0.638791                | 0.716276  | 0.006374  |
| 15               | 6                | 0              | 0.638523                | -0.716569 | -0.005921 |
| 16               | 1                | 0              | -0.542592               | 2.475557  | 0.054761  |
| 17               | 7                | 0              | 1.880540                | 1.384772  | 0.045742  |
| 18               | 1                | 0              | 2.520905                | 1.033801  | -0.662754 |
| 19               | 1                | 0              | 1.767981                | 2.388791  | -0.064200 |
| 20               | 7                | 0              | 1.880005                | -1.385548 | -0.045399 |
| 21               | 1                | 0              | 2.520562                | -1.035080 | 0.663160  |
| 22               | 1                | 0              | 1.767051                | -2.389559 | 0.064179  |
| 23               | 8                | 0              | 1.419048                | -4.407784 | 0.192287  |
| 24               | 1                | 0              | 0.900676                | -4.717233 | 0.939881  |
| 25               | 1                | 0              | 1.029723                | -4.836210 | -0.574698 |
| 26               | 8                | 0              | 1.421008                | 4.407008  | -0.193160 |
| 27               | 1                | 0              | 0.902550                | 4.716802  | -0.940551 |
| 28               | 1                | 0              | 1.032062                | 4.835448  | 0.574012  |
| 29               | 8                | 0              | 3.112156                | -0.252716 | -2.343736 |
| 30               | 1                | 0              | 2.760389                | -0.831111 | -1.638310 |
| 31               | 8                | 0              | 3.115342                | 0.252528  | 2.343357  |
| 32               | 1                | 0              | 4.034122                | 0.508900  | 2.450627  |
| 33               | 1                | 0              | 2.762305                | 0.830047  | 1.637855  |
| 34               | 1                | 0              | 4.029247                | -0.512518 | -2.456939 |

0001baf\_23-diaminonaftalin\_TD\_B3lyp6311++2d2pPCMW\_spopt.log

Standard orientation:

| Center<br>Number | Atomic<br>Number | Atomic<br>Type | Coordinates (Angstroms) |           |           |
|------------------|------------------|----------------|-------------------------|-----------|-----------|
|                  |                  |                | X                       | Y         | Z         |
| 1                | 6                | 0              | -3.162171               | -0.733070 | -0.020597 |
| 2                | 6                | 0              | -1.931560               | -1.425784 | -0.022655 |
| 3                | 6                | 0              | -0.703244               | -0.728738 | -0.005843 |
| 4                | 6                | 0              | -0.751221               | 0.719023  | 0.014324  |
| 5                | 6                | 0              | -2.001807               | 1.382843  | 0.017245  |
| 6                | 6                | 0              | -3.209234               | 0.654273  | 0.000282  |
| 7                | 1                | 0              | 0.576117                | -2.465100 | 0.022832  |
| 8                | 1                | 0              | -4.083053               | -1.301920 | -0.035790 |
| 9                | 1                | 0              | -1.926379               | -2.507469 | -0.033726 |
| 10               | 6                | 0              | 0.559756                | -1.381923 | 0.016156  |
| 11               | 6                | 0              | 0.469872                | 1.410512  | 0.037691  |
| 12               | 1                | 0              | -2.017062               | 2.464933  | 0.033074  |
| 13               | 1                | 0              | -4.158476               | 1.170872  | 0.002618  |
| 14               | 6                | 0              | 1.723865                | 0.717796  | 0.007805  |
| 15               | 6                | 0              | 1.778708                | -0.690845 | 0.028204  |
| 16               | 1                | 0              | 0.483120                | 2.492274  | 0.069263  |
| 17               | 7                | 0              | 2.859151                | 1.442269  | -0.053602 |
| 18               | 1                | 0              | 3.737242                | 0.963174  | -0.183258 |
| 19               | 1                | 0              | 2.838107                | 2.445637  | -0.124163 |
| 20               | 7                | 0              | 3.058276                | -1.319666 | -0.034914 |
| 21               | 1                | 0              | 3.494254                | -1.421554 | 0.876775  |
| 22               | 1                | 0              | 2.996349                | -2.243580 | -0.443678 |



0001caa\_23-diaminonaftalin\_TD\_B3lyp6311++2d2pPCMdms0\_opt.log

Standard orientation:

| Center<br>Number | Atomic<br>Number | Atomic<br>Type | Coordinates (Angstroms) |           |           |
|------------------|------------------|----------------|-------------------------|-----------|-----------|
|                  |                  |                | X                       | Y         | Z         |
| 1                | 6                | 0              | -3.162132               | -0.733288 | -0.020429 |
| 2                | 6                | 0              | -1.931479               | -1.425813 | -0.022421 |
| 3                | 6                | 0              | -0.703272               | -0.728668 | -0.005566 |
| 4                | 6                | 0              | -0.751481               | 0.718993  | 0.014260  |
| 5                | 6                | 0              | -2.001762               | 1.382558  | 0.017078  |
| 6                | 6                | 0              | -3.209354               | 0.653946  | 0.000249  |
| 7                | 1                | 0              | 0.576201                | -2.464891 | 0.022569  |
| 8                | 1                | 0              | -4.082887               | -1.302334 | -0.035562 |
| 9                | 1                | 0              | -1.926230               | -2.507493 | -0.033455 |
| 10               | 6                | 0              | 0.559777                | -1.381712 | 0.016157  |
| 11               | 6                | 0              | 0.469834                | 1.410810  | 0.037111  |
| 12               | 1                | 0              | -2.017187               | 2.464645  | 0.032657  |
| 13               | 1                | 0              | -4.158540               | 1.170609  | 0.002464  |
| 14               | 6                | 0              | 1.723459                | 0.718240  | 0.007538  |
| 15               | 6                | 0              | 1.778716                | -0.690562 | 0.027572  |
| 16               | 1                | 0              | 0.482800                | 2.492601  | 0.068124  |
| 17               | 7                | 0              | 2.859245                | 1.442110  | -0.052493 |
| 18               | 1                | 0              | 3.736505                | 0.960887  | -0.180442 |
| 19               | 1                | 0              | 2.839079                | 2.445364  | -0.124296 |
| 20               | 7                | 0              | 3.059313                | -1.318378 | -0.033573 |
| 21               | 1                | 0              | 3.484675                | -1.437829 | 0.881064  |
| 22               | 1                | 0              | 3.001846                | -2.234704 | -0.459950 |

0011aaa\_23-diaminonaftalin\_+4HOH\_B3lyp6311++2d2p\_PCMw.log

Standard orientation:

| Center<br>Number | Atomic<br>Number | Atomic<br>Type | Coordinates (Angstroms) |           |           |
|------------------|------------------|----------------|-------------------------|-----------|-----------|
|                  |                  |                | X                       | Y         | Z         |
| 1                | 6                | 0              | -4.313721               | 0.706338  | 0.025665  |
| 2                | 6                | 0              | -3.125948               | 1.397767  | 0.051463  |
| 3                | 6                | 0              | -1.884586               | 0.713647  | 0.026808  |
| 4                | 6                | 0              | -1.884706               | -0.713354 | -0.026850 |
| 5                | 6                | 0              | -3.126183               | -1.397266 | -0.051487 |
| 6                | 6                | 0              | -4.313839               | -0.705638 | -0.025671 |
| 7                | 1                | 0              | -0.634985               | 2.476234  | 0.043993  |
| 8                | 1                | 0              | -5.253122               | 1.242026  | 0.044715  |
| 9                | 1                | 0              | -3.125216               | 2.479730  | 0.090100  |
| 10               | 6                | 0              | -0.642337               | 1.393666  | 0.033555  |
| 11               | 6                | 0              | -0.642571               | -1.393580 | -0.033612 |
| 12               | 1                | 0              | -3.125632               | -2.479229 | -0.090124 |
| 13               | 1                | 0              | -5.253330               | -1.241169 | -0.044706 |
| 14               | 6                | 0              | 0.554006                | -0.716856 | -0.002819 |
| 15               | 6                | 0              | 0.554126                | 0.716743  | 0.002748  |
| 16               | 1                | 0              | -0.635397               | -2.476149 | -0.044055 |
| 17               | 7                | 0              | 1.795888                | -1.390840 | -0.034673 |
| 18               | 1                | 0              | 2.444397                | -1.035746 | 0.662676  |
| 19               | 1                | 0              | 1.697221                | -2.396487 | 0.078612  |
| 20               | 7                | 0              | 1.796124                | 1.390517  | 0.034600  |
| 21               | 1                | 0              | 2.444554                | 1.035337  | -0.662782 |
| 22               | 1                | 0              | 1.697623                | 2.396183  | -0.078672 |
| 23               | 8                | 0              | 1.529590                | 4.461696  | -0.223862 |
| 24               | 1                | 0              | 1.636507                | 4.815198  | -1.113209 |
| 25               | 1                | 0              | 2.154771                | 4.956187  | 0.316468  |
| 26               | 8                | 0              | 3.227324                | -0.428212 | -2.327484 |
| 27               | 1                | 0              | 2.781967                | -0.917807 | -1.601699 |
| 28               | 1                | 0              | 4.153773                | -0.681992 | -2.276387 |
| 29               | 8                | 0              | 3.227422                | 0.427721  | 2.327437  |
| 30               | 1                | 0              | 2.782131                | 0.917331  | 1.601623  |
| 31               | 1                | 0              | 4.153910                | 0.681351  | 2.276303  |
| 32               | 8                | 0              | 1.528580                | -4.461894 | 0.223905  |
| 33               | 1                | 0              | 1.633187                | -4.815129 | 1.113633  |
| 34               | 1                | 0              | 2.154790                | -4.956899 | -0.314759 |

Standard orientation:

| Center<br>Number | Atomic<br>Number | Atomic<br>Type | Coordinates (Angstroms) |           |           |
|------------------|------------------|----------------|-------------------------|-----------|-----------|
|                  |                  |                | X                       | Y         | Z         |
| 1                | 6                | 0              | 0.257127                | 6.360835  | 0.181372  |
| 2                | 6                | 0              | 0.984108                | 5.223443  | 0.450586  |
| 3                | 6                | 0              | 0.451491                | 3.935822  | 0.192333  |
| 4                | 6                | 0              | -0.863256               | 3.833107  | -0.359301 |
| 5                | 6                | 0              | -1.586615               | 5.022583  | -0.624366 |
| 6                | 6                | 0              | -1.042662               | 6.259272  | -0.361065 |
| 7                | 1                | 0              | 2.182120                | 2.817642  | 0.838906  |
| 8                | 1                | 0              | 0.679972                | 7.335544  | 0.385010  |
| 9                | 1                | 0              | 1.981206                | 5.301143  | 0.866418  |
| 10               | 6                | 0              | 1.175845                | 2.745220  | 0.444427  |
| 11               | 6                | 0              | -1.397072               | 2.544260  | -0.603448 |
| 12               | 1                | 0              | -2.583647               | 4.944476  | -1.040352 |
| 13               | 1                | 0              | -1.609783               | 7.156621  | -0.569548 |
| 14               | 6                | 0              | -0.688347               | 1.391824  | -0.336072 |
| 15               | 6                | 0              | 0.651612                | 1.496375  | 0.184300  |
| 16               | 1                | 0              | -2.402163               | 2.460116  | -0.998686 |
| 17               | 7                | 0              | -1.202708               | 0.126268  | -0.608834 |
| 18               | 1                | 0              | -0.975043               | -0.592972 | 0.071432  |
| 19               | 1                | 0              | -2.199328               | 0.115142  | -0.806918 |
| 20               | 7                | 0              | 1.353674                | 0.326827  | 0.466767  |
| 21               | 1                | 0              | 1.232347                | -0.427532 | -0.201741 |
| 22               | 1                | 0              | 2.344035                | 0.469853  | 0.647682  |
| 23               | 16               | 0              | -5.067713               | -0.680293 | -0.046670 |
| 24               | 8                | 0              | -4.197427               | -0.199084 | -1.204459 |
| 25               | 16               | 0              | 1.444901                | -2.925330 | -2.452005 |
| 26               | 8                | 0              | 2.109953                | -2.028759 | -1.411423 |
| 27               | 16               | 0              | 5.475172                | -0.173934 | 0.338914  |
| 28               | 8                | 0              | 4.349340                | 0.618381  | 0.997331  |
| 29               | 6                | 0              | 0.228265                | -3.935918 | -1.554843 |
| 30               | 1                | 0              | -0.368074               | -4.485438 | -2.280350 |
| 31               | 1                | 0              | 0.794093                | -4.629980 | -0.938865 |
| 32               | 1                | 0              | -0.388919               | -3.290158 | -0.934158 |
| 33               | 6                | 0              | 0.278400                | -1.869368 | -3.362472 |
| 34               | 1                | 0              | 0.878136                | -1.181929 | -3.953365 |
| 35               | 1                | 0              | -0.320299               | -2.498060 | -4.018270 |
| 36               | 1                | 0              | -0.337627               | -1.327447 | -2.646724 |
| 37               | 6                | 0              | 5.119258                | -1.930382 | 0.649537  |
| 38               | 1                | 0              | 5.868499                | -2.527992 | 0.133713  |
| 39               | 1                | 0              | 5.199278                | -2.080537 | 1.722782  |
| 40               | 1                | 0              | 4.118088                | -2.157577 | 0.290102  |
| 41               | 6                | 0              | 5.133732                | -0.173184 | -1.447293 |
| 42               | 1                | 0              | 5.214353                | 0.858376  | -1.779271 |
| 43               | 1                | 0              | 5.891214                | -0.781234 | -1.938263 |
| 44               | 1                | 0              | 4.135617                | -0.571035 | -1.619228 |
| 45               | 6                | 0              | -4.688750               | -2.442508 | 0.177482  |
| 46               | 1                | 0              | -3.664064               | -2.495468 | 0.540916  |
| 47               | 1                | 0              | -5.374099               | -2.852019 | 0.917179  |
| 48               | 1                | 0              | -4.793849               | -2.950003 | -0.779082 |
| 49               | 6                | 0              | -6.745540               | -0.859758 | -0.721237 |
| 50               | 1                | 0              | -7.381821               | -1.302243 | 0.042255  |
| 51               | 1                | 0              | -7.095335               | 0.139700  | -0.964763 |
| 52               | 1                | 0              | -6.705609               | -1.482305 | -1.612124 |
| 53               | 16               | 0              | -1.004117               | -2.433466 | 2.785050  |
| 54               | 8                | 0              | -1.391668               | -2.287350 | 1.316593  |
| 55               | 6                | 0              | 0.753590                | -2.899228 | 2.806806  |
| 56               | 1                | 0              | 1.095079                | -2.914440 | 3.839714  |
| 57               | 1                | 0              | 0.820170                | -3.895158 | 2.377757  |
| 58               | 1                | 0              | 1.314092                | -2.181065 | 2.213319  |
| 59               | 6                | 0              | -0.815076               | -0.745775 | 3.436588  |
| 60               | 1                | 0              | -1.804022               | -0.295655 | 3.431493  |
| 61               | 1                | 0              | -0.440311               | -0.809530 | 4.456059  |
| 62               | 1                | 0              | -0.131188               | -0.197358 | 2.792458  |

0401acaa\_1\_8\_DAN\_b3lyp6311++2d2p\_PCMwater.log

Standard orientation:

| Center<br>Number | Atomic<br>Number | Atomic<br>Type | Coordinates (Angstroms) |           |           |
|------------------|------------------|----------------|-------------------------|-----------|-----------|
|                  |                  |                | X                       | Y         | Z         |
| 1                | 6                | 0              | 2.492326                | -1.165989 | -0.000037 |
| 2                | 6                | 0              | 1.335414                | -1.904206 | -0.000027 |
| 3                | 6                | 0              | 0.079008                | -1.248173 | -0.000007 |
| 4                | 6                | 0              | -0.001503               | 0.189625  | -0.000003 |
| 5                | 6                | 0              | 1.243421                | 0.932310  | -0.000020 |
| 6                | 6                | 0              | 2.447726                | 0.233495  | -0.000032 |
| 7                | 1                | 0              | -1.027064               | -3.095569 | 0.000011  |
| 8                | 1                | 0              | 3.454590                | -1.661142 | -0.000048 |
| 9                | 1                | 0              | 1.361932                | -2.985053 | -0.000029 |
| 10               | 6                | 0              | -1.112123               | -2.016752 | 0.000017  |
| 11               | 6                | 0              | -1.305835               | 0.780793  | 0.000028  |
| 12               | 1                | 0              | 3.371124                | 0.798473  | -0.000041 |
| 13               | 6                | 0              | -2.432346               | -0.014285 | 0.000039  |
| 14               | 6                | 0              | -2.343252               | -1.417438 | 0.000037  |
| 15               | 1                | 0              | -3.403383               | 0.462858  | 0.000051  |
| 16               | 1                | 0              | -3.245654               | -2.013467 | 0.000049  |
| 17               | 7                | 0              | 1.260469                | 2.299360  | -0.000038 |
| 18               | 1                | 0              | 2.136709                | 2.787335  | 0.000080  |
| 19               | 1                | 0              | 0.378296                | 2.791174  | 0.000102  |
| 20               | 7                | 0              | -1.465942               | 2.225439  | 0.000041  |
| 21               | 1                | 0              | -2.002422               | 2.512794  | -0.810774 |
| 22               | 1                | 0              | -2.002844               | 2.512717  | 0.810603  |

0401acam\_1\_8\_DAN\_TD\_b3lyp6311++2d2p\_PCMw\_opt.log

Standard orientation:

| Center<br>Number | Atomic<br>Number | Atomic<br>Type | Coordinates (Angstroms) |           |           |
|------------------|------------------|----------------|-------------------------|-----------|-----------|
|                  |                  |                | X                       | Y         | Z         |
| 1                | 6                | 0              | 2.564018                | -1.110874 | 0.000034  |
| 2                | 6                | 0              | 1.368267                | -1.847426 | 0.000028  |
| 3                | 6                | 0              | 0.085904                | -1.240366 | -0.000033 |
| 4                | 6                | 0              | -0.017661               | 0.184809  | -0.000020 |
| 5                | 6                | 0              | 1.224215                | 0.919205  | 0.000009  |
| 6                | 6                | 0              | 2.494744                | 0.259684  | 0.000021  |
| 7                | 1                | 0              | -0.989086               | -3.122123 | -0.000113 |
| 8                | 1                | 0              | 3.517892                | -1.617058 | 0.000054  |
| 9                | 1                | 0              | 1.416971                | -2.928480 | 0.000066  |
| 10               | 6                | 0              | -1.086740               | -2.045977 | -0.000090 |
| 11               | 6                | 0              | -1.312697               | 0.783649  | -0.000083 |
| 12               | 1                | 0              | 3.387610                | 0.869464  | 0.000025  |
| 13               | 6                | 0              | -2.469736               | -0.060775 | 0.000044  |
| 14               | 6                | 0              | -2.360272               | -1.431148 | 0.000035  |
| 15               | 1                | 0              | -3.444869               | 0.409797  | 0.000147  |
| 16               | 1                | 0              | -3.253066               | -2.043083 | 0.000129  |
| 17               | 7                | 0              | 1.214082                | 2.264914  | -0.000034 |
| 18               | 1                | 0              | 2.075298                | 2.786143  | -0.000018 |
| 19               | 1                | 0              | 0.295040                | 2.720311  | 0.000032  |
| 20               | 7                | 0              | -1.486361               | 2.222236  | 0.000027  |
| 21               | 1                | 0              | -2.020002               | 2.525216  | -0.810699 |
| 22               | 1                | 0              | -2.020087               | 2.525073  | 0.810756  |

0401acb\_1\_8\_DAN\_TD\_b3lyp6311++2d2p\_PCmDmso\_opt.log

Standard orientation:

| Center<br>Number | Atomic<br>Number | Atomic<br>Type | Coordinates (Angstroms) |           |           |
|------------------|------------------|----------------|-------------------------|-----------|-----------|
|                  |                  |                | X                       | Y         | Z         |
| 1                | 6                | 0              | 2.465967                | -1.259626 | -0.131085 |
| 2                | 6                | 0              | 1.226807                | -1.943534 | -0.063819 |
| 3                | 6                | 0              | -0.000018               | -1.247004 | 0.000029  |
| 4                | 6                | 0              | 0.000006                | 0.196913  | 0.000023  |
| 5                | 6                | 0              | 1.262710                | 0.850712  | 0.072704  |
| 6                | 6                | 0              | 2.485710                | 0.106809  | -0.066366 |
| 7                | 1                | 0              | -1.207965               | -3.024423 | 0.099874  |
| 8                | 1                | 0              | 3.387054                | -1.816917 | -0.227623 |
| 9                | 1                | 0              | 1.207845                | -3.024478 | -0.099829 |
| 10               | 6                | 0              | -1.226883               | -1.943479 | 0.063860  |
| 11               | 6                | 0              | -1.262674               | 0.850749  | -0.072699 |
| 12               | 1                | 0              | 3.418501                | 0.654151  | -0.104938 |
| 13               | 6                | 0              | -2.485722               | 0.106892  | 0.066307  |
| 14               | 6                | 0              | -2.466020               | -1.259540 | 0.131048  |
| 15               | 1                | 0              | -3.418490               | 0.654273  | 0.104831  |
| 16               | 1                | 0              | -3.387126               | -1.816807 | 0.227545  |
| 17               | 7                | 0              | 1.389152                | 2.227179  | 0.243483  |
| 18               | 1                | 0              | 2.308125                | 2.530824  | 0.529619  |
| 19               | 1                | 0              | 0.660795                | 2.689258  | 0.768299  |
| 20               | 7                | 0              | -1.389095               | 2.227176  | -0.243497 |
| 21               | 1                | 0              | -0.660474               | 2.689394  | -0.767816 |
| 22               | 1                | 0              | -2.307968               | 2.530887  | -0.529873 |

0401ada\_1\_8\_DAN\_b3lyp6311++2d2p\_PCmDmso\_TRIPLET.log

Standard orientation:

| Center<br>Number | Atomic<br>Number | Atomic<br>Type | Coordinates (Angstroms) |           |           |
|------------------|------------------|----------------|-------------------------|-----------|-----------|
|                  |                  |                | X                       | Y         | Z         |
| 1                | 6                | 0              | -2.470214               | -1.263170 | 0.110668  |
| 2                | 6                | 0              | -1.220713               | -1.948495 | 0.055402  |
| 3                | 6                | 0              | -0.000010               | -1.246947 | -0.000009 |
| 4                | 6                | 0              | 0.000047                | 0.202828  | -0.000001 |
| 5                | 6                | 0              | -1.262597               | 0.852488  | -0.060768 |
| 6                | 6                | 0              | -2.485465               | 0.094712  | 0.053055  |
| 7                | 1                | 0              | 1.198102                | -3.029328 | -0.076370 |
| 8                | 1                | 0              | -3.391554               | -1.822550 | 0.189162  |
| 9                | 1                | 0              | -1.197840               | -3.029349 | 0.076007  |
| 10               | 6                | 0              | 1.220880                | -1.948481 | -0.055501 |
| 11               | 6                | 0              | 1.262415                | 0.852575  | 0.060803  |
| 12               | 1                | 0              | -3.421250               | 0.638708  | 0.079438  |
| 13               | 6                | 0              | 2.485539                | 0.094786  | -0.052906 |
| 14               | 6                | 0              | 2.470216                | -1.263070 | -0.110595 |
| 15               | 1                | 0              | 3.421275                | 0.638847  | -0.079173 |
| 16               | 1                | 0              | 3.391575                | -1.822458 | -0.188995 |
| 17               | 7                | 0              | -1.396259               | 2.241821  | -0.184241 |
| 18               | 1                | 0              | -2.321270               | 2.536841  | -0.459504 |
| 19               | 1                | 0              | -0.690860               | 2.701270  | -0.742114 |
| 20               | 7                | 0              | 1.396154                | 2.241973  | 0.184054  |
| 21               | 1                | 0              | 0.690852                | 2.701318  | 0.742206  |
| 22               | 1                | 0              | 2.321132                | 2.536786  | 0.459764  |

0402aaa\_1\_5\_DAN\_b3lyp6311++2d2p\_PCMdmso.log

Standard orientation:

| Center<br>Number | Atomic<br>Number | Atomic<br>Type | Coordinates (Angstroms) |           |           |
|------------------|------------------|----------------|-------------------------|-----------|-----------|
|                  |                  |                | X                       | Y         | Z         |
| 1                | 6                | 0              | -1.417250               | -2.090557 | 0.002541  |
| 2                | 6                | 0              | -0.060462               | -1.876019 | 0.019965  |
| 3                | 6                | 0              | 0.452858                | -0.554692 | 0.008066  |
| 4                | 6                | 0              | -0.452871               | 0.554673  | -0.008119 |
| 5                | 6                | 0              | -1.864235               | 0.292853  | -0.009207 |
| 6                | 6                | 0              | -2.317878               | -1.013550 | -0.011686 |
| 7                | 1                | 0              | -1.804277               | -3.100489 | 0.014859  |
| 8                | 1                | 0              | 0.605444                | -2.724714 | 0.060275  |
| 9                | 6                | 0              | 1.864197                | -0.292783 | 0.009175  |
| 10               | 6                | 0              | 0.060500                | 1.876020  | -0.019983 |
| 11               | 1                | 0              | -3.383233               | -1.205072 | -0.011957 |
| 12               | 6                | 0              | 1.417244                | 2.090598  | -0.002472 |
| 13               | 6                | 0              | 2.317878                | 1.013517  | 0.011768  |
| 14               | 1                | 0              | 1.804307                | 3.100511  | -0.014762 |
| 15               | 1                | 0              | 3.383231                | 1.205050  | 0.012188  |
| 16               | 7                | 0              | -2.771683               | 1.352434  | -0.070358 |
| 17               | 1                | 0              | -3.715751               | 1.097657  | 0.177111  |
| 18               | 1                | 0              | -2.493693               | 2.195056  | 0.407561  |
| 19               | 1                | 0              | -0.605401               | 2.724710  | -0.060338 |
| 20               | 7                | 0              | 2.771677                | -1.352593 | 0.070469  |
| 21               | 1                | 0              | 2.493859                | -2.194503 | -0.408925 |
| 22               | 1                | 0              | 3.715674                | -1.097451 | -0.177074 |

0402ada\_1\_5\_DAN\_b3lyp6311++2d2p\_PCMdmso\_TRIPLET.log

Standard orientation:

| Center<br>Number | Atomic<br>Number | Atomic<br>Type | Coordinates (Angstroms) |           |           |
|------------------|------------------|----------------|-------------------------|-----------|-----------|
|                  |                  |                | X                       | Y         | Z         |
| 1                | 6                | 0              | 1.554992                | -2.043637 | -0.001855 |
| 2                | 6                | 0              | 0.136351                | -1.863728 | -0.043329 |
| 3                | 6                | 0              | -0.436894               | -0.579496 | -0.014779 |
| 4                | 6                | 0              | 0.436894                | 0.579497  | 0.014777  |
| 5                | 6                | 0              | 1.841505                | 0.366818  | 0.008625  |
| 6                | 6                | 0              | 2.385019                | -0.970322 | 0.030778  |
| 7                | 1                | 0              | 1.959655                | -3.046316 | -0.000986 |
| 8                | 1                | 0              | -0.485953               | -2.744316 | -0.101083 |
| 9                | 6                | 0              | -1.841505               | -0.366818 | -0.008623 |
| 10               | 6                | 0              | -0.136352               | 1.863729  | 0.043323  |
| 11               | 1                | 0              | 3.459349                | -1.095488 | 0.061924  |
| 12               | 6                | 0              | -1.554992               | 2.043637  | 0.001849  |
| 13               | 6                | 0              | -2.385019               | 0.970321  | -0.030780 |
| 14               | 1                | 0              | -1.959656               | 3.046315  | 0.000977  |
| 15               | 1                | 0              | -3.459349               | 1.095487  | -0.061926 |
| 16               | 7                | 0              | 2.735275                | 1.425876  | 0.045160  |
| 17               | 1                | 0              | 3.682524                | 1.203700  | -0.218686 |
| 18               | 1                | 0              | 2.430238                | 2.303118  | -0.346629 |
| 19               | 1                | 0              | 0.485951                | 2.744318  | 0.101069  |
| 20               | 7                | 0              | -2.735273               | -1.425878 | -0.045150 |
| 21               | 1                | 0              | -2.430237               | -2.303112 | 0.346656  |
| 22               | 1                | 0              | -3.682524               | -1.203698 | 0.218693  |

Standard orientation:

| Center<br>Number | Atomic<br>Number | Atomic<br>Type | Coordinates (Angstroms) |           |           |
|------------------|------------------|----------------|-------------------------|-----------|-----------|
|                  |                  |                | X                       | Y         | Z         |
| 1                | 6                | 0              | -2.234133               | 3.942780  | -1.594737 |
| 2                | 6                | 0              | -1.125419               | 4.690249  | -1.288564 |
| 3                | 6                | 0              | 0.010953                | 4.077486  | -0.701606 |
| 4                | 6                | 0              | 0.016256                | 2.661216  | -0.443071 |
| 5                | 6                | 0              | -1.201245               | 1.928105  | -0.689307 |
| 6                | 6                | 0              | -2.277419               | 2.576640  | -1.284794 |
| 7                | 1                | 0              | 1.107201                | 5.931074  | -0.560842 |
| 8                | 1                | 0              | -3.097936               | 4.409215  | -2.050623 |
| 9                | 1                | 0              | -1.098554               | 5.753011  | -1.488389 |
| 10               | 6                | 0              | 1.142604                | 4.866399  | -0.373056 |
| 11               | 6                | 0              | 1.240052                | 2.070224  | 0.040708  |
| 12               | 1                | 0              | -3.179386               | 2.009606  | -1.473412 |
| 13               | 6                | 0              | 2.312797                | 2.895269  | 0.361504  |
| 14               | 6                | 0              | 2.258911                | 4.282399  | 0.169754  |
| 15               | 1                | 0              | 3.220292                | 2.437780  | 0.732633  |
| 16               | 1                | 0              | 3.120176                | 4.885516  | 0.426735  |
| 17               | 7                | 0              | -1.334538               | 0.577685  | -0.376641 |
| 18               | 1                | 0              | -2.290807               | 0.242187  | -0.436750 |
| 19               | 1                | 0              | -0.904004               | 0.272076  | 0.486400  |
| 20               | 7                | 0              | 1.387217                | 0.698252  | 0.227380  |
| 21               | 1                | 0              | 0.931472                | 0.096009  | -0.446952 |
| 22               | 1                | 0              | 2.351808                | 0.414077  | 0.367958  |
| 23               | 16               | 0              | 4.753223                | -1.646334 | 0.468501  |
| 24               | 8                | 0              | 4.301648                | -0.203254 | 0.675128  |
| 25               | 16               | 0              | -4.727214               | -1.698833 | 0.213288  |
| 26               | 8                | 0              | -4.184353               | -0.556221 | -0.640379 |
| 27               | 6                | 0              | -6.521158               | -1.732770 | -0.078023 |
| 28               | 1                | 0              | -6.666294               | -2.033143 | -1.112103 |
| 29               | 1                | 0              | -6.968600               | -2.465741 | 0.590082  |
| 30               | 1                | 0              | -6.927930               | -0.739155 | 0.095759  |
| 31               | 6                | 0              | -4.754048               | -1.090174 | 1.924085  |
| 32               | 1                | 0              | -5.243123               | -1.836018 | 2.547758  |
| 33               | 1                | 0              | -3.715166               | -0.966747 | 2.224661  |
| 34               | 1                | 0              | -5.288195               | -0.142854 | 1.952701  |
| 35               | 6                | 0              | 4.524728                | -2.006273 | -1.297031 |
| 36               | 1                | 0              | 4.929189                | -2.995760 | -1.501164 |
| 37               | 1                | 0              | 3.453233                | -1.987387 | -1.486052 |
| 38               | 1                | 0              | 5.036111                | -1.244461 | -1.881625 |
| 39               | 6                | 0              | 6.570372                | -1.609226 | 0.488280  |
| 40               | 1                | 0              | 6.869246                | -1.347661 | 1.499624  |
| 41               | 1                | 0              | 6.941920                | -2.599344 | 0.232910  |
| 42               | 1                | 0              | 6.916863                | -0.862029 | -0.222114 |
| 43               | 16               | 0              | 0.114914                | -1.611643 | -2.962645 |
| 44               | 8                | 0              | 1.103851                | -1.694543 | -1.806340 |
| 45               | 6                | 0              | -1.313163               | -2.635496 | -2.496628 |
| 46               | 1                | 0              | -1.818822               | -2.115775 | -1.687966 |
| 47               | 1                | 0              | -1.974741               | -2.720688 | -3.356407 |
| 48               | 1                | 0              | -0.957995               | -3.611725 | -2.174171 |
| 49               | 6                | 0              | 0.777056                | -2.694928 | -4.265794 |
| 50               | 1                | 0              | 0.052633                | -2.752064 | -5.075458 |
| 51               | 1                | 0              | 1.695073                | -2.233725 | -4.619746 |
| 52               | 1                | 0              | 0.977364                | -3.677898 | -3.845471 |
| 53               | 16               | 0              | -0.509814               | -0.951330 | 3.713685  |
| 54               | 8                | 0              | -1.376547               | -0.844874 | 2.464467  |
| 55               | 6                | 0              | 0.935127                | -1.953810 | 3.249625  |
| 56               | 1                | 0              | 1.631554                | -1.969451 | 4.085464  |
| 57               | 1                | 0              | 0.569224                | -2.957524 | 3.051154  |
| 58               | 1                | 0              | 1.390809                | -1.523558 | 2.361137  |
| 59               | 6                | 0              | 0.344222                | 0.646073  | 3.878400  |
| 60               | 1                | 0              | -0.416369               | 1.383028  | 4.121702  |
| 61               | 1                | 0              | 1.066156                | 0.574070  | 4.689235  |
| 62               | 1                | 0              | 0.825323                | 0.879908  | 2.931435  |

0406qbb\_1\_8\_DAN\_HB\_+4HOH\_TD\_b3lyp6311++2d2pdp\_PCMw\_NOSYMM\_optsp.log

Standard orientation:

| Center<br>Number | Atomic<br>Number | Atomic<br>Type | Coordinates (Angstroms) |           |           |
|------------------|------------------|----------------|-------------------------|-----------|-----------|
|                  |                  |                | X                       | Y         | Z         |
| 1                | 6                | 0              | 3.988227                | -0.107068 | 0.048706  |
| 2                | 6                | 0              | 3.446421                | -1.401974 | 0.056360  |
| 3                | 6                | 0              | 2.050209                | -1.656652 | 0.028198  |
| 4                | 6                | 0              | 1.135606                | -0.559197 | -0.008190 |
| 5                | 6                | 0              | 1.715675                | 0.762823  | -0.024469 |
| 6                | 6                | 0              | 3.133220                | 0.966836  | 0.007600  |
| 7                | 1                | 0              | 2.274333                | -3.812603 | 0.059365  |
| 8                | 1                | 0              | 5.058288                | 0.037744  | 0.073197  |
| 9                | 1                | 0              | 4.115636                | -2.252132 | 0.084868  |
| 10               | 6                | 0              | 1.567616                | -2.995303 | 0.033527  |
| 11               | 6                | 0              | -0.267685               | -0.825218 | -0.030268 |
| 12               | 1                | 0              | 3.500122                | 1.983531  | -0.002277 |
| 13               | 6                | 0              | -0.712318               | -2.186786 | -0.030264 |
| 14               | 6                | 0              | 0.173962                | -3.237884 | -0.000486 |
| 15               | 1                | 0              | -1.778726               | -2.373424 | -0.052594 |
| 16               | 1                | 0              | -0.195813               | -4.255359 | -0.001633 |
| 17               | 7                | 0              | 0.927801                | 1.851194  | -0.072733 |
| 18               | 1                | 0              | 1.324792                | 2.786343  | -0.094192 |
| 19               | 1                | 0              | -0.082757               | 1.671358  | -0.098167 |
| 20               | 7                | 0              | -1.249099               | 0.239800  | -0.056132 |
| 21               | 1                | 0              | -1.898953               | 0.116368  | -0.829384 |
| 22               | 1                | 0              | -1.822963               | 0.237585  | 0.786983  |
| 23               | 8                | 0              | -3.427183               | 0.463022  | 2.297393  |
| 24               | 1                | 0              | -4.114221               | 0.550986  | 1.606887  |
| 25               | 8                | 0              | -3.843136               | 0.040967  | -2.097153 |
| 26               | 1                | 0              | -3.961069               | 0.601527  | -2.872134 |
| 27               | 8                | 0              | 2.155987                | 4.574482  | -0.132320 |
| 28               | 1                | 0              | 1.886807                | 5.163352  | 0.580679  |
| 29               | 8                | 0              | -5.246697               | 0.864869  | 0.202647  |
| 30               | 1                | 0              | -4.832663               | 0.551956  | -0.624667 |
| 31               | 1                | 0              | -3.598141               | -0.383396 | 2.720868  |
| 32               | 1                | 0              | -6.095564               | 0.415394  | 0.257222  |
| 33               | 1                | 0              | -4.029909               | -0.854458 | -2.400555 |
| 34               | 1                | 0              | 2.002514                | 5.074096  | -0.941242 |

0406qcb\_1\_8\_DAN+4HOH\_TD\_sym\_b3lyp6311++2d2p\_PCMw\_NOSYMM\_jo\_spopt.log

Standard orientation:

| Center<br>Number | Atomic<br>Number | Atomic<br>Type | Coordinates (Angstroms) |           |           |
|------------------|------------------|----------------|-------------------------|-----------|-----------|
|                  |                  |                | X                       | Y         | Z         |
| 1                | 6                | 0              | 2.421399                | 2.374230  | 0.477161  |
| 2                | 6                | 0              | 1.203040                | 3.053545  | 0.234151  |
| 3                | 6                | 0              | -0.000040               | 2.352651  | -0.000035 |
| 4                | 6                | 0              | -0.000049               | 0.906055  | 0.000008  |
| 5                | 6                | 0              | 1.269418                | 0.260946  | 0.075155  |
| 6                | 6                | 0              | 2.454914                | 1.009232  | 0.401064  |
| 7                | 1                | 0              | -1.172950               | 4.134125  | -0.272510 |
| 8                | 1                | 0              | 3.316651                | 2.932932  | 0.711220  |
| 9                | 1                | 0              | 1.172838                | 4.134160  | 0.272274  |
| 10               | 6                | 0              | -1.203157               | 3.053514  | -0.234285 |
| 11               | 6                | 0              | -1.269515               | 0.260954  | -0.075085 |
| 12               | 1                | 0              | 3.374590                | 0.462509  | 0.559630  |
| 13               | 6                | 0              | -2.455046               | 1.009217  | -0.401066 |
| 14               | 6                | 0              | -2.421503               | 2.374205  | -0.477239 |
| 15               | 1                | 0              | -3.374712               | 0.462475  | -0.559599 |
| 16               | 1                | 0              | -3.316749               | 2.932912  | -0.711314 |
| 17               | 7                | 0              | 1.451614                | -1.111214 | -0.119693 |
| 18               | 1                | 0              | 2.417375                | -1.371246 | -0.308299 |
| 19               | 1                | 0              | 0.827745                | -1.557357 | -0.783889 |
| 20               | 7                | 0              | -1.451766               | -1.111117 | 0.119870  |
| 21               | 1                | 0              | -0.827874               | -1.557402 | 0.783941  |
| 22               | 1                | 0              | -2.417547               | -1.371225 | 0.308282  |
| 23               | 8                | 0              | 0.526849                | -2.513623 | 2.245522  |
| 24               | 1                | 0              | 1.042538                | -2.139150 | 1.502499  |
| 25               | 8                | 0              | -4.331191               | -2.020473 | 0.602314  |
| 26               | 1                | 0              | -4.486498               | -2.933242 | 0.337498  |

|    |   |   |           |           |           |
|----|---|---|-----------|-----------|-----------|
| 27 | 8 | 0 | 4.331230  | -2.020230 | -0.602214 |
| 28 | 1 | 0 | 4.631729  | -1.971143 | -1.515814 |
| 29 | 8 | 0 | -0.526543 | -2.514013 | -2.245557 |
| 30 | 1 | 0 | -1.042819 | -2.139831 | -1.502854 |
| 31 | 1 | 0 | -4.630832 | -1.972449 | 1.516245  |
| 32 | 1 | 0 | -0.609770 | -3.468827 | -2.158454 |
| 33 | 1 | 0 | 0.610761  | -3.468388 | 2.158532  |
| 34 | 1 | 0 | 4.487064  | -2.933118 | -0.338111 |

0413caa\_1\_5\_DAN\_4DMSO\_b3lyp6311++2d2p\_PCMDmso.log

Standard orientation:

| Center Number | Atomic Number | Atomic Type | Coordinates (Angstroms) |           |           |
|---------------|---------------|-------------|-------------------------|-----------|-----------|
|               |               |             | X                       | Y         | Z         |
| 1             | 6             | 0           | 0.265255                | 2.618167  | -0.539139 |
| 2             | 6             | 0           | -0.840631               | 1.805299  | -0.627189 |
| 3             | 6             | 0           | -0.684338               | 0.424542  | -0.909739 |
| 4             | 6             | 0           | 0.629144                | -0.114575 | -1.107553 |
| 5             | 6             | 0           | 1.766181                | 0.762027  | -0.997602 |
| 6             | 6             | 0           | 1.559106                | 2.105781  | -0.718641 |
| 7             | 1             | 0           | 0.142749                | 3.671653  | -0.322857 |
| 8             | 1             | 0           | -1.822622               | 2.226964  | -0.476008 |
| 9             | 6             | 0           | -1.820992               | -0.453877 | -1.011829 |
| 10            | 6             | 0           | 0.784344                | -1.490309 | -1.413410 |
| 11            | 1             | 0           | 2.415798                | 2.762064  | -0.638471 |
| 12            | 6             | 0           | -0.321944               | -2.301597 | -1.510720 |
| 13            | 6             | 0           | -1.614135               | -1.794367 | -1.308186 |
| 14            | 7             | 0           | 3.049156                | 0.291691  | -1.226691 |
| 15            | 1             | 0           | 3.797306                | 0.903077  | -0.915086 |
| 16            | 1             | 0           | 3.246288                | -0.683827 | -1.043974 |
| 17            | 1             | 0           | 1.766016                | -1.910239 | -1.569769 |
| 18            | 1             | 0           | -0.200261               | -3.351453 | -1.744530 |
| 19            | 7             | 0           | -3.109714               | 0.033575  | -0.878201 |
| 20            | 1             | 0           | -3.827853               | -0.666696 | -0.723899 |
| 21            | 1             | 0           | -3.261193               | 0.874887  | -0.336078 |
| 22            | 1             | 0           | -2.470524               | -2.451244 | -1.386011 |
| 23            | 16            | 0           | 4.705399                | -3.481238 | 0.154435  |
| 24            | 8             | 0           | 4.189650                | -2.573734 | -0.955596 |
| 25            | 16            | 0           | 6.277085                | 1.778775  | 0.747603  |
| 26            | 8             | 0           | 5.335093                | 2.142116  | -0.394778 |
| 27            | 16            | 0           | -5.750435               | -2.551247 | 0.866416  |
| 28            | 8             | 0           | -5.335392               | -2.029762 | -0.505193 |
| 29            | 16            | 0           | -5.298520               | 3.176524  | -0.010330 |
| 30            | 8             | 0           | -4.096705               | 2.518560  | 0.658834  |
| 31            | 6             | 0           | 6.319574                | 3.224176  | 1.848775  |
| 32            | 1             | 0           | 5.333064                | 3.306055  | 2.296541  |
| 33            | 1             | 0           | 7.067291                | 3.053475  | 2.620415  |
| 34            | 1             | 0           | 6.551854                | 4.110031  | 1.262120  |
| 35            | 6             | 0           | 7.961644                | 1.924596  | 0.081361  |
| 36            | 1             | 0           | 8.671544                | 1.779281  | 0.892842  |
| 37            | 1             | 0           | 8.074871                | 1.137554  | -0.658997 |
| 38            | 1             | 0           | 8.078584                | 2.904216  | -0.376231 |
| 39            | 6             | 0           | 6.259610                | -2.741451 | 0.740947  |
| 40            | 1             | 0           | 6.605018                | -3.299124 | 1.608886  |
| 41            | 1             | 0           | 6.975844                | -2.834524 | -0.070876 |
| 42            | 1             | 0           | 6.087488                | -1.695686 | 0.985289  |
| 43            | 6             | 0           | 3.693706                | -3.127963 | 1.623741  |
| 44            | 1             | 0           | 2.688178                | -3.474801 | 1.402557  |
| 45            | 1             | 0           | 4.102392                | -3.680668 | 2.467003  |
| 46            | 1             | 0           | 3.699158                | -2.057143 | 1.812831  |
| 47            | 6             | 0           | -5.014685               | -4.205911 | 1.025238  |
| 48            | 1             | 0           | -3.938769               | -4.065720 | 1.081330  |
| 49            | 1             | 0           | -5.379978               | -4.664183 | 1.941769  |
| 50            | 1             | 0           | -5.281469               | -4.798182 | 0.152965  |
| 51            | 6             | 0           | -7.485920               | -3.065386 | 0.704826  |
| 52            | 1             | 0           | -7.793273               | -3.551659 | 1.628159  |
| 53            | 1             | 0           | -8.067208               | -2.161068 | 0.547674  |
| 54            | 1             | 0           | -7.579079               | -3.736621 | -0.145796 |
| 55            | 6             | 0           | -6.575578               | 3.326447  | 1.274435  |
| 56            | 1             | 0           | -7.413087               | 3.890647  | 0.869664  |
| 57            | 1             | 0           | -6.890817               | 2.316425  | 1.521244  |
| 58            | 1             | 0           | -6.148825               | 3.820724  | 2.144076  |
| 59            | 6             | 0           | -4.890182               | 4.941340  | -0.162585 |



|    |   |   |           |          |           |
|----|---|---|-----------|----------|-----------|
| 60 | 1 | 0 | -4.080132 | 5.013904 | -0.882998 |
| 61 | 1 | 0 | -5.765406 | 5.472504 | -0.530561 |
| 62 | 1 | 0 | -4.577640 | 5.318420 | 0.808528  |

0413cca\_1\_5\_DAN\_4DMSO\_TD\_b3lyp6311++2d2p\_PCMdms0\_opt.log

Standard orientation:

| Center<br>Number | Atomic<br>Number | Atomic<br>Type | Coordinates (Angstroms) |           |           |
|------------------|------------------|----------------|-------------------------|-----------|-----------|
|                  |                  |                | X                       | Y         | Z         |
| 1                | 6                | 0              | 0.327577                | 2.505808  | 0.127885  |
| 2                | 6                | 0              | -0.820205               | 1.687362  | -0.036744 |
| 3                | 6                | 0              | -0.698134               | 0.293300  | -0.219440 |
| 4                | 6                | 0              | 0.625851                | -0.292017 | -0.272158 |
| 5                | 6                | 0              | 1.761198                | 0.560814  | -0.138517 |
| 6                | 6                | 0              | 1.585953                | 1.970194  | 0.085264  |
| 7                | 1                | 0              | 0.198135                | 3.568543  | 0.285053  |
| 8                | 1                | 0              | -1.793826               | 2.153298  | 0.003929  |
| 9                | 6                | 0              | -1.832402               | -0.562270 | -0.358824 |
| 10               | 6                | 0              | 0.745902                | -1.686868 | -0.450690 |
| 11               | 1                | 0              | 2.464954                | 2.588476  | 0.205698  |
| 12               | 6                | 0              | -0.398808               | -2.508649 | -0.613626 |
| 13               | 6                | 0              | -1.657081               | -1.973556 | -0.575084 |
| 14               | 7                | 0              | 3.044943                | 0.076657  | -0.146089 |
| 15               | 1                | 0              | 3.804166                | 0.749461  | -0.207228 |
| 16               | 1                | 0              | 3.261020                | -0.846835 | -0.503413 |
| 17               | 1                | 0              | 1.720402                | -2.150965 | -0.491890 |
| 18               | 1                | 0              | -0.267256               | -3.571332 | -0.768245 |
| 19               | 7                | 0              | -3.111790               | -0.084774 | -0.341725 |
| 20               | 1                | 0              | -3.884785               | -0.744705 | -0.350891 |
| 21               | 1                | 0              | -3.338169               | 0.864952  | -0.069561 |
| 22               | 1                | 0              | -2.535910               | -2.591287 | -0.698378 |
| 23               | 16               | 0              | 5.146257                | -3.502294 | -0.597133 |
| 24               | 8                | 0              | 4.114123                | -2.569185 | -1.223306 |
| 25               | 16               | 0              | 6.446043                | 2.010530  | 0.643055  |
| 26               | 8                | 0              | 5.286208                | 2.064665  | -0.347079 |
| 27               | 16               | 0              | -5.992250               | -2.571186 | 0.805538  |
| 28               | 8                | 0              | -5.446879               | -1.927859 | -0.466843 |
| 29               | 16               | 0              | -5.338818               | 3.114436  | -0.475891 |
| 30               | 8                | 0              | -4.202968               | 2.623962  | 0.417997  |
| 31               | 6                | 0              | 6.373584                | 3.556947  | 1.594862  |
| 32               | 1                | 0              | 5.473219                | 3.509862  | 2.201199  |
| 33               | 1                | 0              | 7.252094                | 3.613232  | 2.234061  |
| 34               | 1                | 0              | 6.331294                | 4.396896  | 0.905321  |
| 35               | 6                | 0              | 7.943941                | 2.378983  | -0.317456 |
| 36               | 1                | 0              | 8.784208                | 2.466887  | 0.367894  |
| 37               | 1                | 0              | 8.098038                | 1.541282  | -0.991874 |
| 38               | 1                | 0              | 7.790140                | 3.299986  | -0.874909 |
| 39               | 6                | 0              | 6.440317                | -2.437780 | 0.108515  |
| 40               | 1                | 0              | 7.137056                | -3.060461 | 0.665450  |
| 41               | 1                | 0              | 6.948379                | -1.965408 | -0.727659 |
| 42               | 1                | 0              | 5.977356                | -1.691832 | 0.750621  |
| 43               | 6                | 0              | 4.428397                | -4.087385 | 0.967431  |
| 44               | 1                | 0              | 3.584596                | -4.720874 | 0.708200  |
| 45               | 1                | 0              | 5.180532                | -4.666086 | 1.499314  |
| 46               | 1                | 0              | 4.101381                | -3.230138 | 1.551942  |
| 47               | 6                | 0              | -6.055280               | -4.357274 | 0.478182  |
| 48               | 1                | 0              | -5.026472               | -4.697137 | 0.398307  |
| 49               | 1                | 0              | -6.546983               | -4.848510 | 1.315101  |
| 50               | 1                | 0              | -6.591811               | -4.528257 | -0.452200 |
| 51               | 6                | 0              | -7.781088               | -2.252036 | 0.802356  |
| 52               | 1                | 0              | -8.232293               | -2.788327 | 1.634419  |
| 53               | 1                | 0              | -7.908227               | -1.181329 | 0.935567  |
| 54               | 1                | 0              | -8.197382               | -2.574919 | -0.149036 |
| 55               | 6                | 0              | -6.523674               | 3.937300  | 0.629257  |
| 56               | 1                | 0              | -7.299787               | 4.402670  | 0.025456  |
| 57               | 1                | 0              | -6.954158               | 3.162806  | 1.257942  |
| 58               | 1                | 0              | -5.995123               | 4.673251  | 1.230767  |
| 59               | 6                | 0              | -4.712605               | 4.595973  | -1.322087 |
| 60               | 1                | 0              | -3.927183               | 4.262204  | -1.994668 |
| 61               | 1                | 0              | -5.525242               | 5.043775  | -1.890114 |
| 62               | 1                | 0              | -4.318681               | 5.288102  | -0.581502 |

0413q\_aac\_1\_5\_DAN\_4HOH\_b3lyp6311++2d2p\_PCMw\_sp\_assym.log

Standard orientation:

| Center<br>Number | Atomic<br>Number | Atomic<br>Type | Coordinates (Angstroms) |           |           |
|------------------|------------------|----------------|-------------------------|-----------|-----------|
|                  |                  |                | X                       | Y         | Z         |
| 1                | 6                | 0              | 0.467305                | 2.480901  | -0.323046 |
| 2                | 6                | 0              | -0.692044               | 1.741974  | -0.313653 |
| 3                | 6                | 0              | -0.632044               | 0.325567  | -0.296214 |
| 4                | 6                | 0              | 0.642828                | -0.328623 | -0.302137 |
| 5                | 6                | 0              | 1.836589                | 0.474459  | -0.293333 |
| 6                | 6                | 0              | 1.724047                | 1.856594  | -0.305489 |
| 7                | 1                | 0              | 0.417160                | 3.561781  | -0.338865 |
| 8                | 1                | 0              | -1.644119               | 2.249772  | -0.327188 |
| 9                | 6                | 0              | -1.825852               | -0.477313 | -0.283330 |
| 10               | 6                | 0              | 0.703119                | -1.744967 | -0.326886 |
| 11               | 1                | 0              | 2.624087                | 2.457487  | -0.301423 |
| 12               | 6                | 0              | -0.456597               | -2.483522 | -0.331079 |
| 13               | 6                | 0              | -1.713184               | -1.859397 | -0.302063 |
| 14               | 7                | 0              | 3.088758                | -0.122939 | -0.335325 |
| 15               | 1                | 0              | 3.862452                | 0.488747  | -0.104963 |
| 16               | 1                | 0              | 3.189867                | -1.036412 | 0.085823  |
| 17               | 1                | 0              | 1.654834                | -2.252905 | -0.350023 |
| 18               | 1                | 0              | -0.406695               | -3.564328 | -0.352198 |
| 19               | 7                | 0              | -3.078213               | 0.119695  | -0.315579 |
| 20               | 1                | 0              | -3.851634               | -0.492321 | -0.085274 |
| 21               | 1                | 0              | -3.179200               | 1.032767  | 0.105729  |
| 22               | 1                | 0              | -2.613121               | -2.460425 | -0.294504 |
| 23               | 8                | 0              | 3.939853                | -2.920520 | 0.836846  |
| 24               | 1                | 0              | 4.901724                | -2.945783 | 0.874734  |
| 25               | 8                | 0              | 5.531103                | 1.726093  | 0.293633  |
| 26               | 1                | 0              | 5.842388                | 1.702382  | 1.204504  |
| 27               | 8                | 0              | -5.532183               | -1.719524 | 0.298262  |
| 28               | 1                | 0              | -6.243854               | -1.585085 | -0.336341 |
| 29               | 8                | 0              | -4.072987               | 2.830182  | 0.915729  |
| 30               | 1                | 0              | -3.556824               | 3.319251  | 1.564954  |
| 31               | 1                | 0              | -4.343137               | 3.489631  | 0.268146  |
| 32               | 1                | 0              | -5.939452               | -1.578567 | 1.159362  |
| 33               | 1                | 0              | 3.651762                | -3.135118 | 1.730189  |
| 34               | 1                | 0              | 6.308653                | 1.527949  | -0.238709 |

0413qdab\_1\_5\_DAN\_5HOH\_TD\_b3lyp6311++2d2p\_PCMw\_spopt\_assym.log

Standard orientation:

| Center<br>Number | Atomic<br>Number | Atomic<br>Type | Coordinates (Angstroms) |           |           |
|------------------|------------------|----------------|-------------------------|-----------|-----------|
|                  |                  |                | X                       | Y         | Z         |
| 1                | 6                | 0              | 0.704492                | -2.474368 | 0.056517  |
| 2                | 6                | 0              | -0.456401               | -1.663877 | 0.051704  |
| 3                | 6                | 0              | -0.387803               | -0.252314 | -0.011742 |
| 4                | 6                | 0              | 0.910109                | 0.376599  | -0.022762 |
| 5                | 6                | 0              | 2.067133                | -0.465586 | -0.008980 |
| 6                | 6                | 0              | 1.943866                | -1.898200 | 0.022510  |
| 7                | 1                | 0              | 0.602247                | -3.549888 | 0.089219  |
| 8                | 1                | 0              | -1.418765               | -2.152382 | 0.094398  |
| 9                | 6                | 0              | -1.551013               | 0.563081  | -0.054567 |
| 10               | 6                | 0              | 0.995019                | 1.786060  | -0.040708 |
| 11               | 1                | 0              | 2.845395                | -2.494502 | 0.022939  |
| 12               | 6                | 0              | -0.188257               | 2.573358  | -0.025063 |
| 13               | 6                | 0              | -1.427612               | 1.986651  | -0.027767 |
| 14               | 7                | 0              | 3.322774                | 0.044463  | -0.033686 |
| 15               | 1                | 0              | 4.121731                | -0.581065 | -0.024583 |
| 16               | 1                | 0              | 3.520494                | 1.036142  | -0.068568 |
| 17               | 1                | 0              | 1.950901                | 2.286764  | -0.035727 |
| 18               | 1                | 0              | -0.103731               | 3.652027  | -0.018080 |
| 19               | 7                | 0              | -2.840409               | -0.000398 | -0.009785 |
| 20               | 1                | 0              | -3.568828               | 0.656590  | -0.276086 |
| 21               | 1                | 0              | -2.962275               | -0.865531 | -0.528924 |
| 22               | 1                | 0              | -2.325682               | 2.589945  | -0.024418 |
| 23               | 8                | 0              | 4.448734                | 2.870972  | -0.132338 |
| 24               | 1                | 0              | 5.085279                | 3.010684  | 0.576611  |
| 25               | 8                | 0              | 5.674490                | -1.831249 | -0.014227 |
| 26               | 1                | 0              | 6.212340                | -1.804430 | -0.812635 |

|    |   |   |           |           |           |
|----|---|---|-----------|-----------|-----------|
| 27 | 8 | 0 | -5.185767 | 1.933159  | -0.717990 |
| 28 | 1 | 0 | -6.008142 | 1.664382  | -0.295127 |
| 29 | 8 | 0 | -3.750429 | -2.563046 | -1.561118 |
| 30 | 1 | 0 | -3.125481 | -2.986062 | -2.159403 |
| 31 | 1 | 0 | 4.940734  | 3.030019  | -0.944668 |
| 32 | 1 | 0 | 6.296414  | -1.707440 | 0.710600  |
| 33 | 1 | 0 | -4.076903 | -3.275609 | -1.001532 |
| 34 | 1 | 0 | -5.394975 | 1.981359  | -1.656673 |
| 35 | 8 | 0 | -3.608685 | -0.690100 | 2.700899  |
| 36 | 1 | 0 | -3.331694 | -0.475415 | 1.780843  |
| 37 | 1 | 0 | -2.919558 | -1.270356 | 3.039461  |

---
